# Supplementary material
Source: publisher site journal article supplement (https://www.spandidos-publications.com/3117/downloadSupplementary)
Supplement: Supplementary file 1 [file downloadSupplementary]

## Sheet: Sheet1
Table SI. Differently expressed genes between FaDuCIS‑R and FaDuCIS‑S.
Gene	P value	Qvalue	log2
ZNF207	3.52e-08	1.14e-07	-2.51821
MKNK1	5.29e-18	3.49e-17	-14.4158
HACL1	6.78e-25	6.39e-24	-7.73346
TTC1	4.3e-184	5.41e-182	2.93579
BIN1	6.55e-06	1.67e-05	5.26066
THADA	3.06e-23	2.66e-22	-7.6121
MMS19	1.25e-06	3.46e-06	-1.10325
H2AFY	1.36e-13	6.81e-13	-6.67371
ZPLD1	4.04e-05	9.4e-05	4.1247
ZFP30	3.07e-16	1.82e-15	2.27404
FAM153A	0.000254	0.000531	3.15475
PARP2	6.45e-05	0.000146	4.93447
MLH1	1.46e-41	2.54e-40	2.28203
PPFIBP1	1.72e-16	1.03e-15	7.05136
RALY	1.64e-36	2.43e-35	-3.18555
XKR9	5.3e-05	0.000121	1.40668
SAFB	3.47e-38	5.42e-37	1.13434
WDR19	1.69e-07	5.13e-07	-5.6414
MBNL1	8.33e-14	4.23e-13	-2.55803
PLEKHA6	4.53e-26	4.51e-25	5.5759
PPL	9.73e-57	2.58e-55	-1.30011
NMB	1.43e-06	3.94e-06	1.02678
TNFAIP2	2.08e-20	1.56e-19	-1.03314
POLK	4.03e-06	1.05e-05	1.2273
BMF	2.4e-15	1.35e-14	2.68515
NCOA1	5.5e-39	8.82e-38	-4.07643
ACTN1	6.3e-37	9.45e-36	8.48034
GLIS3	4.87e-06	1.26e-05	5.29876
C1orf112	1.09e-13	5.48e-13	1.70385
ACBD5	1.14e-15	6.51e-15	6.96205
CRYBB3	2.84e-07	8.42e-07	-1.13728
TRIM5	3.61e-39	5.83e-38	8.58659
CDKN3	4.6e-29	5.17e-28	-1.94956
PALLD	9.58e-143	8.68e-141	-1.02887
ADAMTS13	6.51e-10	2.46e-09	1.79701
NLRC5	2.49e-47	5.12e-46	8.92975
SLC16A7	1.52e-33	2.02e-32	-8.26381
DMTN	1.61e-08	5.38e-08	1.20645
FN1	8.92e-36	1.29e-34	3.56898
TRAF3	2.15e-25	2.07e-24	-7.76858
ESRRG	2.06e-05	4.96e-05	-5.07046
PLA2G15	4e-20	2.97e-19	1.72928
LOC100132874	0.000263	0.000549	1.8215
PPIL2	8.65e-05	0.000193	1.51519
EFEMP1	2.78e-06	7.42e-06	-5.33223
ALG9	2.21e-16	1.32e-15	-1.36394
SCIN	1.25e-06	3.45e-06	-5.42678
TGFBR3L	1.85e-05	4.48e-05	5.12045
ILF3	0	0	-3.48791
DICER1	1.36e-47	2.82e-46	-1.74964
RIPK1	7.84e-08	2.47e-07	1.92128
ERC1	2.47e-62	7.5e-61	-3.10398
NEFM	6.78e-07	1.93e-06	-1.71214
MMP1	2.27e-146	2.13e-144	-1.43534
ARMH4	1.24e-07	3.8e-07	-5.67261
PSRC1	0.000139	0.000302	1.29117
RBMS1	3.32e-05	7.8e-05	2.65402
AIMP1	2.43e-13	1.2e-12	-3.05853
TANC1	9.07e-06	2.28e-05	1.11938
KLF15	2.01e-05	4.84e-05	4.21674
2021-09-07	2.87e-08	9.39e-08	-5.81126
NUP50	2.35e-137	2.03e-135	-3.2766
RPS6KA3	0.000144	0.000312	1.132
CITED2	4.01e-19	2.82e-18	-7.26928
CEP85	3.98e-06	1.04e-05	-5.2883
PHLPP1	0.000149	0.000322	1.18445
YPEL5	3.88e-81	1.67e-79	1.29095
KDM6A	6.12e-09	2.13e-08	1.17323
ANO10	3.35e-09	1.19e-08	1.27698
ZNF789	6.25e-05	0.000142	4.93931
GLS	4.26e-11	1.77e-10	1.01251
CFAP69	0.000308	0.000637	2.1751
PELI3	8.03e-12	3.53e-11	-1.46055
MPC1	0.000175	0.000373	-4.73571
TYW1B	7.11e-07	2.02e-06	-1.11434
ANGEL2	1.87e-05	4.54e-05	-5.08378
MBD1	0.000226	0.000476	1.42911
CDK19	7.43e-23	6.34e-22	7.6249
GFPT2	3.66e-13	1.78e-12	-1.51687
HLTF	1.09e-08	3.71e-08	1.7308
GIGYF1	7.25e-13	3.44e-12	2.12444
SLC16A3	1.34e-26	1.36e-25	2.4079
OXR1	1.24e-14	6.64e-14	2.17392
RUNX1	8.14e-05	0.000182	1.16788
DAG1	8.56e-16	4.95e-15	-6.935
LHFPL2	1.79e-20	1.36e-19	7.43075
FAXC	0.000262	0.000546	-1.14561
TXLNG	1.71e-90	8.53e-89	-1.14323
NR2C1	0.000189	0.000402	-4.72192
SLFN5	0	0	1.84471
RUNDC3B	3.04e-05	7.18e-05	-5.01414
HELZ	0.000352	0.000722	-4.60893
ZNF266	1.14e-06	3.16e-06	1.21599
DTWD1	3.39e-08	1.1e-07	-1.0939
SMARCAD1	3.1e-59	8.76e-58	9.34042
NCAM2	2.17e-05	5.21e-05	5.09814
ASNS	4.45e-06	1.16e-05	-1.07639
MTMR3	1.26e-27	1.33e-26	7.9611
TNS1	1.82e-05	4.41e-05	-5.08792
FGD3	2.86e-15	1.6e-14	-1.03108
STAU1	7.14e-111	4.68e-109	3.60115
LOC102723360	1.11e-05	2.76e-05	-5.15575
APPL2	8.44e-07	2.38e-06	5.50712
RAP1GAP	6.2e-12	2.74e-11	6.48712
WDR20	3.36e-24	3.06e-23	4.8646
IVD	4.57e-22	3.75e-21	-1.02122
MCAM	7.82e-09	2.7e-08	5.96371
LSS	1.39e-41	2.41e-40	-1.18971
ACBD5	0.000126	0.000275	4.82487
TCF7L2	2e-12	9.18e-12	6.55734
DDX59	7.71e-12	3.39e-11	-6.43395
PRMT1	5.52e-19	3.85e-18	2.2153
TATDN1	3.94e-09	1.4e-08	6.02137
CALCRL	9.16e-07	2.58e-06	5.49798
MDM1	8.93e-07	2.52e-06	-3.24502
OBSCN	1.96e-08	6.51e-08	3.52634
CCDC51	1.13e-23	1e-22	7.68714
PIAS2	0.000136	0.000295	2.41831
GHR	0.000208	0.000441	-4.70477
EXT2	4.63e-10	1.77e-09	6.19023
FAM172A	5.15e-06	1.33e-05	4.0523
NRG1	0.000113	0.000247	-4.80976
PIAS2	0.000481	0.000968	-3.28956
CEP350	2.02e-49	4.41e-48	-8.96322
ANKRD28	6.02e-25	5.68e-24	-7.73716
RSPH3	1.62e-10	6.46e-10	2.90264
ZNF766	4.13e-05	9.59e-05	1.00046
RTN2	5.91e-96	3.18e-94	1.351
PLK3	0.000206	0.000437	1.70218
TNS1	1.47e-08	4.96e-08	5.90858
PIK3C2B	6.24e-16	3.63e-15	1.18977
PNKD	2.29e-107	1.44e-105	2.50705
CFAP57	2.3e-06	6.2e-06	-5.35508
BBX	2.28e-15	1.28e-14	6.92792
ARID3B	1.5e-20	1.14e-19	1.56754
PHYHIP	1.43e-13	7.15e-13	2.03671
PTP4A1	8.61e-17	5.27e-16	1.4469
DLX4	5.16e-25	4.89e-24	1.42761
PIGF	2.97e-13	1.45e-12	-6.62981
LOC105369201	4.3e-56	1.12e-54	2.23274
PWWP2A	6.86e-08	2.17e-07	-5.72989
PPP4R3A	6.22e-248	1.15e-245	-1.47872
GIT2	1.12e-36	1.67e-35	1.24721
MIER1	0.000406	0.000825	-4.58218
PCCA	0.000147	0.000318	-4.76496
UNKL	6.77e-09	2.35e-08	5.97599
CSF2RA	1.34e-05	3.31e-05	1.73721
PRKG2	8.19e-08	2.57e-07	-5.71284
PLA2G6	0.000358	0.000732	-1.07388
TTC39A	2.1e-16	1.26e-15	1.57065
SMARCD3	2.8e-11	1.18e-10	1.31804
PASK	2.5e-05	5.97e-05	-5.04257
SHTN1	1.16e-45	2.27e-44	-8.81938
USP10	2.88e-05	6.82e-05	5.05693
SUPT20H	9.34e-09	3.2e-08	5.94844
GPR35	1.35e-05	3.33e-05	5.16404
RBMS2	8.33e-29	9.28e-28	1.34185
TXNL4B	1.16e-09	4.29e-09	1.33348
PTPRM	6.81e-09	2.36e-08	3.66133
ARHGAP26	1.11e-15	6.35e-15	1.63165
ZNF449	6.91e-05	0.000156	1.56379
FBH1	1.03e-10	4.17e-10	1.66962
NIPA2	3.1e-24	2.84e-23	-4.31804
RFTN2	3.78e-05	8.81e-05	2.61934
OSGIN2	1.92e-07	5.79e-07	-2.28979
XKR8	3.77e-08	1.22e-07	1.86875
C16orf70	8.86e-40	1.46e-38	8.61451
PPP4R4	1.57e-07	4.78e-07	1.47137
BIRC6	4.28e-14	2.21e-13	6.77708
ZSWIM5	8.1e-10	3.04e-09	-5.09729
ARHGAP12	6.58e-13	3.13e-12	1.28602
RALGPS1	6.4e-11	2.62e-10	5.4915
HDAC5	1.61e-60	4.68e-59	1.88067
RAPGEF2	7.4e-11	3.02e-10	6.32263
ZNF600	3.57e-21	2.81e-20	-7.44803
SIMC1	0.000445	0.000899	-4.56446
CDH13	8.22e-52	1.9e-50	-3.75069
EIF4G3	4.25e-18	2.82e-17	-7.17281
VEZT	0.000158	0.000339	1.04039
UPF3B	6.78e-05	0.000153	1.7271
IFT88	0.000112	0.000246	4.84459
HDAC9	1.93e-10	7.62e-10	2.63382
ZNF83	1.01e-47	2.1e-46	4.41173
USP36	1.08e-16	6.58e-16	-7.03165
STK36	2.09e-19	1.49e-18	1.49616
AFAP1L2	4.51e-06	1.17e-05	2.93069
CCNT2	1.5e-15	8.56e-15	1.02549
LYPLAL1	2.06e-05	4.96e-05	-5.07046
TUBB8P12	1.65e-05	4.01e-05	-5.10191
LINS1	7.24e-16	4.2e-15	6.98373
LARP4	4.72e-21	3.69e-20	2.00853
YAP1	9.87e-07	2.76e-06	1.59151
PXK	2.18e-06	5.89e-06	-1.89429
ZFYVE27	0.000152	0.000328	1.19401
FKBP1B	3.81e-05	8.89e-05	-4.98069
GID4	0.000252	0.000527	-1.64193
ODF3L1	3.07e-08	1e-07	1.1856
ACACB	7.61e-07	2.16e-06	5.51879
AASS	2.29e-22	1.91e-21	7.58675
DPY19L2	3.56e-05	8.34e-05	5.02546
MMP16	0.000103	0.000228	-1.208
DNAH5	1.76e-06	4.79e-06	1.30947
KRT18	0	0	-1.20636
STK31	4.68e-06	1.22e-05	-5.26801
SIRT7	2.44e-09	8.78e-09	1.76467
LYSMD4	5.44e-08	1.73e-07	1.99276
RAB34	3.02e-20	2.25e-19	-7.36944
PMS2	1.55e-06	4.24e-06	1.0703
SUMF1	1.42e-45	2.76e-44	1.09854
MRE11	5.02e-12	2.24e-11	-6.46102
NDUFAF7	0.000253	0.000529	1.76507
SYCP2	2.76e-05	6.55e-05	5.06315
USP25	1.08e-08	3.68e-08	6.15834
ABLIM1	1.08e-28	1.2e-27	3.48027
TANC1	1.87e-07	5.66e-07	-1.16524
WNK2	1.3e-14	6.95e-14	-6.7997
ANKS3	4.44e-07	1.29e-06	-5.5411
BNC2	0.000186	0.000396	-2.22535
GART	2.94e-10	1.14e-09	1.09026
TRAP1	3.57e-127	2.82e-125	-10.7239
COMMD4	2.1e-20	1.58e-19	-7.38298
GRAMD2B	4.73e-22	3.88e-21	4.66683
PPP1R10	1.52e-38	2.4e-37	-2.48437
BLOC1S2	6.12e-07	1.76e-06	-5.50626
ALG13	6.75e-05	0.000153	-1.60207
HPS5	4.41e-33	5.78e-32	8.28279
NEK7	8.32e-07	2.35e-06	1.8175
GLE1	0.00013	0.000283	-1.76973
PLEKHA1	2.4e-06	6.45e-06	-2.16488
DHFR2	5.55e-09	1.94e-08	5.99282
NAPRT	1.82e-09	6.62e-09	6.08425
USF3	1.55e-47	3.21e-46	1.95153
R3HDM2	2.92e-15	1.63e-14	1.18699
2021-09-02	1.43e-07	4.39e-07	-1.18245
ATP9B	1.45e-06	3.99e-06	-1.78474
TARBP2	8.43e-15	4.58e-14	6.86226
HELLS	1.6e-68	5.56e-67	9.60933
GALNT6	9.27e-06	2.33e-05	5.21515
ZNF25	1.37e-16	8.28e-16	7.06182
ATRX	2.23e-20	1.68e-19	7.42266
ATE1	2.12e-09	7.67e-09	8.35087
HMGA1	1.13e-29	1.3e-28	1.35749
SRSF11	9.47e-31	1.14e-29	8.15202
MRPL10	1.74e-14	9.22e-14	1.00056
BTN3A2	5.43e-18	3.58e-17	1.05702
DELE1	2.6e-07	7.75e-07	1
UBA7	3.03e-07	8.96e-07	1.18451
ZDHHC11	1.41e-05	3.47e-05	-5.12304
PRRC2C	8.71e-05	0.000194	1.25368
OGFOD1	4.95e-13	2.38e-12	-1.19046
PPIP5K1	2.32e-22	1.93e-21	-2.69863
NAE1	2.07e-10	8.14e-10	1.36173
LOC112268342	0.000273	0.000568	2.70172
CHD9	6.8e-14	3.47e-13	-6.94775
R3HDM2	1.51e-07	4.6e-07	5.68972
OGFOD3	3.79e-14	1.97e-13	-6.74334
UEVLD	1.97e-34	2.7e-33	1.45602
RNF34	3.68e-07	1.08e-06	1.19572
TCTN1	9.93e-10	3.7e-09	6.13189
KIFC3	1.79e-13	8.87e-13	2.82874
FUT5	3.34e-10	1.29e-09	4.14113
ALDH3A2	3.11e-217	4.77e-215	-1.28349
CABLES1	1.38e-11	5.95e-11	3.49918
GRK2	5.57e-20	4.1e-19	1.18565
LMBR1	3.17e-10	1.23e-09	6.21834
CEP192	1.15e-16	7.01e-16	-6.82249
USP10	4.75e-59	1.33e-57	-9.2887
R3HCC1L	1.1e-09	4.07e-09	-1.51937
PLEKHA1	2.56e-17	1.62e-16	-7.09576
HP1BP3	3.92e-20	2.91e-19	-1.1594
KIAA1522	1.28e-14	6.86e-14	6.84072
BRWD1	1.14e-14	6.15e-14	-6.80625
PTPRM	2.14e-06	5.78e-06	5.3997
DMAP1	8.45e-07	2.39e-06	1.30208
MTUS1	3.71e-07	1.09e-06	5.59672
KRT15	0	0	-2.17478
UTP4	4.63e-15	2.55e-14	6.89272
RHBDF2	7.24e-22	5.89e-21	2.53259
RBFOX2	5.27e-10	2e-09	-2.02229
OBSCN	8.64e-07	2.44e-06	5.50451
MAP2K7	4.51e-151	4.42e-149	-2.18005
RBL1	4.49e-12	2.01e-11	6.50744
PELI1	5.59e-11	2.31e-10	-2.91807
AKR1A1	2.23e-05	5.35e-05	-1.70722
TTLL3	1.08e-13	5.46e-13	1.53233
PKM	0.000397	0.000808	1.26097
RHOT2	8.74e-20	6.36e-19	7.37066
ABCA2	7.88e-13	3.73e-12	6.61315
MSTO1	8.8e-08	2.75e-07	1.21551
TARDBP	2.46e-38	3.87e-37	1.4832
CEP170	1.14e-08	3.86e-08	1.28503
NDST3	0.000247	0.000518	4.70739
NCOR1	9.24e-15	5e-14	-1.91333
CIC	3.31e-46	6.56e-45	8.88604
DYRK2	3.27e-42	5.77e-41	-8.67715
CBSL	0.000127	0.000276	-1.09047
DOC2A	1.4e-13	6.99e-13	6.7122
ZSCAN20	3.46e-05	8.11e-05	-1.09144
PBRM1	9.54e-09	3.26e-08	-1.19855
GRAMD1B	2.66e-07	7.92e-07	5.63178
GADD45B	8.94e-05	0.000199	1.17011
MARK3	1.54e-24	1.42e-23	1.66552
SREBF1	1.01e-38	1.6e-37	-8.52149
CCNL2	4.98e-12	2.22e-11	-2.16117
SLC41A2	5.05e-28	5.45e-27	7.98642
SLC26A1	7.07e-05	0.000159	4.91988
ECHDC2	7.91e-07	2.24e-06	2.2422
RGS3	4.77e-15	2.63e-14	6.89123
2021-03-07	8.96e-55	2.24e-53	-3.45344
TRIM2	1.84e-10	7.26e-10	8.88178
CDK12	9.83e-21	7.55e-20	2.13268
PAQR3	7.36e-07	2.09e-06	1.11387
DCP1A	3.1e-75	1.21e-73	-1.86489
STK11IP	1.47e-06	4.04e-06	-5.4077
APP	2.99e-12	1.35e-11	1.31436
VPS26C	7.65e-05	0.000172	1.32896
PPP3CB	8.68e-76	3.44e-74	1.21782
MANBA	3.66e-15	2.03e-14	1.73915
ZNF248	1.03e-07	3.21e-07	3.16465
RASSF8	1.38e-06	3.8e-06	5.45137
MKNK1	4.55e-06	1.19e-05	-1.11272
SYTL2	0.00042	0.00085	4.60891
ALDOA	3.06e-14	1.6e-13	1.4453
ZDHHC20	7.83e-25	7.36e-24	-1.2767
KMT5B	3.39e-08	1.1e-07	-1.00787
PASK	1.72e-26	1.74e-25	7.88636
ZFP42	3.09e-05	7.29e-05	2.81294
MTMR12	6.21e-07	1.78e-06	5.54122
CPLX1	1.26e-10	5.05e-10	6.28516
RAD51C	3.51e-08	1.14e-07	5.83009
PGBD1	1.73e-07	5.25e-07	-1.74073
SUDS3	9.24e-30	1.07e-28	1.99625
USP45	2.7e-09	9.68e-09	6.05248
SWT1	1.5e-08	5.03e-08	-2.24592
VIPAS39	1.52e-14	8.08e-14	-1.8975
RIF1	3.06e-08	9.97e-08	2.63178
HMGN1	2.94e-05	6.94e-05	-5.01935
CYB561D1	5.95e-07	1.71e-06	-1.29115
RUNX1	2.22e-111	1.46e-109	-5.22575
ZNF227	3.81e-05	8.89e-05	-3.72615
ZNF821	5.88e-05	0.000134	4.94892
SSH1	3.24e-150	3.15e-148	2.3844
LRRC4B	9.59e-07	2.69e-06	1.70318
AKR1E2	3.95e-05	9.2e-05	5.00993
LTBP4	1.94e-29	2.22e-28	8.07418
D2HGDH	0.000329	0.000678	-4.62155
NCF4	1.84e-05	4.46e-05	3.72748
SLC41A2	6.23e-10	2.36e-09	6.16775
TMEM39A	3.92e-10	1.51e-09	-6.16401
CCDC159	0.000203	0.000429	4.74321
AFMID	0.000127	0.000277	-4.78957
ANKRD6	2.09e-05	5.03e-05	5.10332
ZDHHC23	1.69e-07	5.14e-07	2.57952
SLC7A6	1.6e-16	9.66e-16	1.95141
CLIP4	8.9e-132	7.36e-130	2.25396
PRDM16	3.71e-06	9.74e-06	5.33296
CCDC17	0.000308	0.000636	1.86513
EFNA4	3.19e-24	2.92e-23	7.72765
TRIM31	6.13e-15	3.35e-14	2.00785
DPP8	1.68e-13	8.34e-13	1.90107
CNOT7	6.07e-13	2.9e-12	6.62849
TXNDC16	1.48e-22	1.24e-21	1.90084
KCNE3	0.000437	0.000883	-2.60681
SLC25A19	3.66e-16	2.16e-15	-6.97534
ABLIM3	8.56e-07	2.42e-06	-5.46929
SPOCK3	0.000391	0.000797	4.6222
NFRKB	6.14e-20	4.52e-19	-2.32324
TENT4B	0.000121	0.000263	-4.79869
BBX	3.51e-08	1.14e-07	5.83009
CCM2	2.62e-07	7.82e-07	1.3915
GTDC1	0.000126	0.000273	4.82592
HTRA3	7.52e-12	3.31e-11	-3.2702
ANK2	1.36e-05	3.36e-05	3.56182
MUC1	3.68e-12	1.66e-11	-6.48036
MAPKAPK3	3.51e-05	8.22e-05	1.88236
ADAL	8.94e-09	3.06e-08	5.95228
POLL	6.4e-09	2.22e-08	1.11653
MICALL1	5.41e-18	3.57e-17	-7.16264
ULK1	5.44e-17	3.38e-16	-7.06248
HIVEP2	0	0	1.92794
OSBPL6	2.71e-10	1.06e-09	-6.1912
CARF	0.000286	0.000593	4.68109
INSIG2	1.05e-89	5.19e-88	1.84856
SEMA4G	8.4e-05	0.000187	4.89223
ZBTB45	4.62e-14	2.38e-13	1.17796
GM2A	2.02e-07	6.09e-07	1.32423
BIRC6	1.03e-111	6.76e-110	8.50801
ASAP2	4.74e-29	5.32e-28	1.38127
PLEKHB2	6.77e-70	2.4e-68	1.51716
FGGY	8.62e-06	2.17e-05	2.97007
NGF	2.64e-09	9.47e-09	-3.45889
ZNF518A	8.84e-14	4.48e-13	1.5293
CDKL1	1.02e-06	2.86e-06	5.48547
BCL7A	2.86e-36	4.21e-35	-2.01102
SCAMP5	1.84e-05	4.46e-05	-1.10381
ZNF223	1.92e-08	6.38e-08	-1.84112
METTL23	5.65e-16	3.3e-15	-1.05632
FBXL2	1.67e-06	4.57e-06	5.42886
RABGAP1	1.9e-46	3.8e-45	1.15631
FOXRED1	1.24e-06	3.42e-06	1.22307
XRRA1	0.000101	0.000224	2.10643
MAPKBP1	0.000399	0.00081	-4.5857
MTG2	9.89e-55	2.47e-53	1.0814
MPDZ	9.29e-14	4.7e-13	6.7349
SURF2	3.54e-05	8.29e-05	-1.18678
FOXA2	4.33e-26	4.3e-25	2.78961
SGCE	5.25e-09	1.84e-08	-1.00902
FOPNL	2.49e-20	1.87e-19	-1.68682
TESMIN	9.32e-31	1.12e-29	-1.35307
ZNF567	0.000176	0.000375	-4.73465
CSPP1	2.35e-05	5.63e-05	1.77901
ZNF333	4.17e-07	1.22e-06	-5.54773
INPP4A	1.52e-05	3.71e-05	-5.11333
TMEM234	6.2e-09	2.16e-08	5.9835
OBSCN	7.04e-10	2.65e-09	3.91596
TLE3	9.45e-58	2.57e-56	-1.17094
TATDN3	9.55e-09	3.27e-08	5.94653
ARHGAP26	6.02e-08	1.91e-07	1.63606
TRPM2	7.76e-05	0.000174	4.77944
CDK12	9.55e-06	2.39e-05	5.21116
FRMD6	2.44e-87	1.16e-85	9.98972
CNNM1	3.49e-28	3.8e-27	7.99654
MBIP	1.09e-62	3.33e-61	3.16107
NDUFAF6	1.09e-27	1.16e-26	-1.77414
KLHL28	8.75e-12	3.83e-11	2.31512
RPS6KC1	3.59e-05	8.4e-05	-4.98957
PLXNA3	0.00022	0.000463	4.72877
PRIMPOL	6.06e-06	1.55e-05	5.27066
TNFSF15	8.58e-24	7.68e-23	1.62544
LDB3	3.13e-05	7.39e-05	5.04443
GBA2	2.4e-17	1.52e-16	1.2906
PRMT2	8.67e-101	5.05e-99	-1.42762
NAT9	6.58e-15	3.59e-14	2.30907
SETD5	3.52e-16	2.08e-15	7.01794
DKK4	0.000466	0.000939	2.082
SMIM25	0.000176	0.000376	-1.83363
CTNNAL1	4.1e-19	2.88e-18	7.31
MIGA2	3.66e-09	1.3e-08	2.50091
IAH1	0.000255	0.000532	-4.66875
MOB1B	6.06e-11	2.49e-10	1.15422
SETX	5.94e-24	5.36e-23	7.70782
METTL8	7.84e-09	2.7e-08	-5.92578
CAMK2D	2.22e-08	7.33e-08	5.87215
CUX1	8.77e-143	7.96e-141	-2.37137
LUC7L3	1.73e-157	1.8e-155	1.31664
CHURC1-FNTB	2.79e-29	3.17e-28	8.06459
LCLAT1	7.94e-24	7.12e-23	-2.14742
UBR2	0.000312	0.000644	4.66484
BAG6	2.98e-53	7.18e-52	2.05242
SCOC	3.22e-20	2.4e-19	2.52237
PRKCZ	8.4e-05	0.000187	4.89223
KBTBD2	3.93e-15	2.18e-14	6.90092
ZNF83	3.44e-05	8.06e-05	-1.12048
ZNF232	9.38e-07	2.63e-06	5.49535
ALG9	1.13e-06	3.13e-06	-2.01003
ST3GAL3	1.94e-05	4.7e-05	5.11362
PLEKHA1	0.000143	0.000309	1.60754
ACVR1C	4.61e-05	0.000106	-1.12981
ARAF	0.000189	0.000402	4.75532
LIPH	1e-09	3.74e-09	2.61752
KMT5C	2.63e-18	1.76e-17	-7.19293
SLC26A2	1.04e-22	8.8e-22	1.26163
ATP6V1E2	3.69e-10	1.42e-09	6.20716
FANCC	3.4e-06	8.98e-06	-2.79237
SLBP	7.6e-09	2.62e-08	-1.78959
RGPD1	1.15e-19	8.34e-19	3.28737
BTN3A3	1.27e-124	9.82e-123	1.83685
VPS26A	1.37e-16	8.28e-16	-2.4127
TOR1AIP1	1.1e-21	8.88e-21	-7.48993
NRG1	6.26e-06	1.6e-05	-5.15147
TACC1	0.000428	0.000866	4.60526
ARMC9	0.000112	0.000246	4.84459
DNAJB6	1.56e-52	3.7e-51	4.04479
ZNF652	8.07e-05	0.00018	2.05226
MLLT1	0.000267	0.000556	-1.96277
SHISA5	3.31e-39	5.35e-38	1.11145
PTK2	3.1e-10	1.21e-09	-4.3272
THSD4	1.16e-08	3.93e-08	1.75084
DLG5	0.000233	0.00049	1.11247
VTA1	5.93e-09	2.06e-08	-1.62394
MICAL3	9.84e-06	2.46e-05	5.20716
OTUD3	1.23e-09	4.56e-09	6.1149
PLEKHG4	4.8e-14	2.48e-13	6.77086
GRK2	2.06e-12	9.42e-12	-6.51613
SPIDR	7.94e-06	2.01e-05	-1.19518
HSPBAP1	2.68e-14	1.41e-13	6.80197
CYLD	3.06e-34	4.18e-33	2.29938
ADGRF1	4.3e-41	7.37e-40	2.8814
CCRL2	0.000328	0.000676	1.65051
TMCC2	3.93e-26	3.91e-25	1.48362
DMXL1	2.15e-22	1.79e-21	-7.54668
FANCA	3.1e-14	1.62e-13	-2.4924
CXCR2	5.54e-09	1.94e-08	1.32524
RPS6KA3	1.3e-38	2.07e-37	-8.51628
YBEY	0.000171	0.000366	-1.78305
USP21	1.87e-09	6.8e-09	6.08206
BRPF1	1.12e-30	1.34e-29	-1.17926
BAHCC1	5.18e-62	1.57e-60	-5.39499
GEM	4.59e-28	4.97e-27	2.09458
CXorf38	3.09e-46	6.13e-45	3.79395
F12	1.52e-30	1.82e-29	1.25653
NLRX1	5.33e-40	8.84e-39	8.62452
HNRNPH1	2.87e-09	1.03e-08	6.04757
PPP1R16A	0.000283	0.000587	1.80323
EYA1	3.18e-16	1.88e-15	1.58338
ARMC10	1.11e-27	1.18e-26	-5.37759
TMEM216	0.000173	0.00037	11.1568
CCNA1	4.28e-05	9.92e-05	1.65255
GSN	3.37e-07	9.91e-07	-5.57039
VASH2	8.23e-05	0.000184	1.92133
RUFY4	8.6e-05	0.000192	2.57887
DPY19L3	1.25e-12	5.82e-12	-1.1067
MAP3K9	9.59e-09	3.28e-08	1.23084
ZNF429	7.22e-07	2.05e-06	-1.49019
NIPA2	7.1e-05	0.00016	-4.88497
BANK1	3.62e-05	8.47e-05	1.41499
SMG1	1.33e-16	8.04e-16	-2.50931
NOXA1	6.36e-25	6e-24	7.77816
SUPT20H	8.05e-10	3.02e-09	-1.17061
ZNF302	3.27e-06	8.65e-06	5.3483
GNAI2	1.18e-06	3.27e-06	1.52997
NDRG2	7.19e-06	1.83e-05	1.0508
SAT1	0	0	2.42312
HDLBP	4.98e-50	1.1e-48	1.93142
DEPDC5	4.17e-13	2.02e-12	-1.51072
CREM	8.36e-10	3.13e-09	4.39009
RNF170	1.63e-06	4.46e-06	2.51085
A4GALT	0.0002	0.000425	-1.44713
RNH1	7.15e-289	1.61e-286	-3.95307
SBF2	7.07e-85	3.23e-83	9.18399
DZANK1	4.48e-08	1.44e-07	5.80753
PDE4D	1.34e-08	4.52e-08	2.064
ZFYVE27	0.000491	0.000987	4.57825
RPE	2.86e-12	1.3e-11	6.53548
CEP57L1	6.32e-07	1.81e-06	5.53931
MBP	1.96e-05	4.75e-05	-5.07713
SGMS2	3.56e-80	1.51e-78	-5.78617
ZNF292	1.05e-09	3.9e-09	-1.57756
NUBPL	3.4e-08	1.11e-07	-5.79566
TEX9	5.54e-10	2.1e-09	-3.39991
SLC12A9	3.57e-10	1.38e-09	6.20956
GRIN1	0.000494	0.000993	4.57701
CDK20	1.21e-10	4.86e-10	1.38335
BANP	1.45e-05	3.56e-05	1.31881
MAOA	2.26e-14	1.19e-13	1.82865
POLL	1.64e-17	1.05e-16	3.23976
SNAP47	1.68e-15	9.52e-15	-6.90246
HMBOX1	1.24e-17	8.02e-17	7.16837
MIS18BP1	5.52e-34	7.46e-33	1.04821
MAPKBP1	4.19e-05	9.72e-05	-1.10142
ABAT	5.05e-20	3.73e-19	2.42426
ABCA7	4.99e-24	4.51e-23	5.24715
RNGTT	3.92e-11	1.63e-10	6.36636
NEDD4L	1.59e-15	9.06e-15	6.94557
IL9R	1.33e-11	5.73e-11	-6.39906
PPM1L	1.14e-11	4.95e-11	-1.29329
DDX11	1.24e-10	4.98e-10	-6.24743
NBEA	1.06e-09	3.92e-09	2.18167
EHF	1.34e-08	4.53e-08	-5.87924
AURKB	1.99e-07	5.99e-07	-5.62497
PPIP5K1	1.14e-11	4.96e-11	-6.40869
HACE1	1.12e-08	3.81e-08	5.93254
KIAA0586	3.65e-05	8.53e-05	5.02182
RPRD1B	2.25e-18	1.51e-17	-1.34094
RASAL1	2.88e-25	2.76e-24	7.8025
SLK	8.65e-08	2.71e-07	1.11212
RNF24	9.12e-18	5.93e-17	1.0439
FAM172A	1.24e-06	3.43e-06	1.6105
SLC24A1	2.3e-05	5.51e-05	5.08947
FOXRED1	2.67e-57	7.18e-56	-1.61262
BCL2L1	4.63e-40	7.69e-39	-1.08283
BBS9	1.79e-06	4.88e-06	2.11106
PDE6A	1.07e-07	3.31e-07	2.85365
PTPRM	3.23e-30	3.81e-29	8.12077
ZNF420	3.49e-05	8.17e-05	-4.99399
B4GALT3	1.54e-09	5.66e-09	4.30945
LRRK1	0.000106	0.000234	-4.81975
TRIM2	2.06e-34	2.82e-33	3.97281
ZNF211	1.36e-15	7.76e-15	-2.1695
SMAP2	2.9e-05	6.87e-05	-5.02108
FLI1	2.22e-07	6.67e-07	-5.61353
KCTD16	6.72e-06	1.71e-05	2.4363
EXOC1	3.6e-76	1.44e-74	1.70189
PRMT2	2.05e-49	4.47e-48	1.91418
ACY3	1.92e-07	5.79e-07	5.66542
SHPRH	3.44e-08	1.12e-07	-5.79464
UBD	1.9e-66	6.3e-65	2.5778
RCOR3	1.91e-15	1.08e-14	-1.59573
STRN4	1.99e-65	6.47e-64	-11.2698
GOLGA8B	3.74e-48	7.92e-47	6.78008
DDHD2	4.02e-17	2.52e-16	1.53178
MARK1	5.56e-35	7.77e-34	-8.33894
RBBP5	5.86e-44	1.09e-42	1.52481
KTN1	9.02e-36	1.3e-34	-1.51415
DENND4B	1.78e-53	4.33e-52	9.15264
SP6	1.49e-05	3.65e-05	5.15077
KIAA1109	4.25e-05	9.85e-05	-4.96457
PFKM	1.81e-05	4.38e-05	5.12385
SYNRG	0.000259	0.000541	-1.43371
DCP2	1.02e-11	4.44e-11	2.68987
GPBP1	3.91e-23	3.38e-22	-1.8698
GPSM1	1.01e-33	1.36e-32	1.39595
PQBP1	2.58e-15	1.45e-14	-6.88139
ACAP3	4.1e-24	3.72e-23	-7.67715
CPEB3	3.13e-05	7.39e-05	-5.00978
SFXN4	0.000234	0.000492	1.18119
NEK6	1.12e-05	2.77e-05	5.19023
PSME4	2.69e-72	9.95e-71	9.70884
TMEM218	1.12e-37	1.73e-36	2.74193
MAN2B1	4.59e-15	2.53e-14	1.1792
RIMS2	6.94e-05	0.000157	1.99038
TMCO3	3.36e-05	7.89e-05	1.08339
RHOT2	5.6e-28	6.04e-27	2.50916
TBCD	1.8e-24	1.67e-23	1.01138
USP19	6.95e-07	1.98e-06	2.16443
ARMH3	3.01e-09	1.08e-08	1.42412
PUF60	0.000364	0.000743	1.39278
CD82	6.17e-43	1.11e-41	1.64818
PIK3CD	1.6e-16	9.67e-16	7.05449
GAPVD1	0.000154	0.000332	2.81557
SLC25A19	5.24e-08	1.67e-07	-1.24442
CEP76	0.000188	0.0004	4.75642
AGPAT1	2.88e-13	1.41e-12	6.67154
ICA1	8.67e-18	5.64e-17	-3.80335
TAF2	3.82e-07	1.12e-06	5.59366
MINAR1	6.16e-10	2.33e-09	6.16858
GPATCH8	6.28e-09	2.18e-08	-5.94462
CDK17	1.31e-44	2.48e-43	8.82206
KIF21A	2.2e-11	9.37e-11	6.40495
MINDY1	3.16e-14	1.65e-13	6.79319
AGBL4	7.24e-06	1.84e-05	-5.21221
BUD31	0.000153	0.00033	4.79212
CNTNAP2	6.05e-11	2.48e-10	1.30368
PLOD2	7.4e-17	4.55e-16	7.08969
XPC	9.07e-20	6.6e-19	7.36922
CBLC	8.17e-14	4.15e-13	1.42828
TRAPPC12	4.55e-27	4.73e-26	2.32769
FAM135A	0.000235	0.000494	1.33006
CDYL	1.63e-33	2.17e-32	-1.14166
HEATR3	9.9e-50	2.18e-48	-1.91769
ATP6V0A1	9.21e-14	4.66e-13	-6.69531
CCDC18	5.76e-05	0.000131	-4.91789
SMAD7	7.82e-05	0.000175	-7.23143
DLG1	4.3e-11	1.79e-10	-1.60322
UGCG	1.19e-184	1.5e-182	1.19093
TDRKH	2.66e-06	7.11e-06	5.37352
TNK2	2.68e-06	7.16e-06	1.40168
TCOF1	1.33e-128	1.06e-126	-10.7452
SFMBT1	5.17e-55	1.31e-53	-4.49759
GIGYF2	1.47e-50	3.29e-49	-9.0047
VCX	2.43e-05	5.8e-05	5.08163
DALRD3	0.000344	0.000706	-1.70969
S100PBP	8.32e-22	6.74e-21	-1.8526
BCOR	7.78e-16	4.51e-15	-6.93959
ISYNA1	6.38e-08	2.02e-07	-5.73676
NME9	0.000236	0.000496	8.18087
GOLGB1	1.28e-76	5.18e-75	2.50718
MTRF1	5.79e-07	1.66e-06	5.54883
NR6A1	2.99e-09	1.07e-08	1.05346
USP19	9.03e-14	4.57e-13	-6.69639
SLC37A1	2.77e-07	8.24e-07	1.43689
KIAA1257	7.95e-05	0.000178	4.90117
TCTN2	2.25e-30	2.66e-29	-8.08658
CCDC18	6.83e-07	1.95e-06	3.06667
C19orf44	5.56e-08	1.77e-07	-5.74989
IQCG	6.77e-09	2.35e-08	5.97599
MDM4	5.49e-42	9.64e-41	-1.35183
FAM69B	1.28e-08	4.31e-08	1.31304
ZC2HC1C	4.7e-06	1.22e-05	2.8456
THOC1	3.17e-05	7.47e-05	5.04263
TMEM154	2.18e-59	6.17e-58	1.0708
ARNTL2	8.59e-06	2.16e-05	-1.68104
ARHGAP27	1.08e-11	4.68e-11	1.80063
EPB41	0.000244	0.000511	-1.04274
STAU1	7.9e-12	3.47e-11	-1.11448
UXS1	4.86e-32	6.14e-31	-8.18174
UCKL1	2.2e-11	9.34e-11	-6.36603
FRRS1	2.08e-07	6.26e-07	-5.62041
FGD4	2.71e-09	9.73e-09	6.05203
GRAMD2A	3.25e-09	1.16e-08	6.03723
RIMS2	0.000375	0.000766	1.45381
LOC105371031	0.000142	0.000307	3.94412
AGAP2	1.13e-195	1.51e-193	2.47408
TNK2	7.86e-14	4e-13	6.74404
ZNF446	9.43e-07	2.65e-06	5.4947
CCDC122	2.77e-13	1.36e-12	2.51258
FNDC3B	1.58e-64	5.03e-63	9.49822
SH2D3A	2.09e-16	1.25e-15	-7.00147
FRK	4.86e-10	1.85e-09	6.18657
AIMP1	1.46e-14	7.78e-14	-6.79363
IL17RC	2.18e-05	5.25e-05	-5.06206
STK36	1.8e-06	4.89e-06	-5.38433
PARP8	8.86e-31	1.07e-29	8.15368
IFT172	5.36e-05	0.000123	4.96323
A4GALT	8.42e-06	2.12e-05	1.99549
PLCB4	1.44e-06	3.95e-06	-1.54342
SRRM1	5.39e-14	2.77e-13	6.76461
ITSN1	6.21e-08	1.97e-07	5.77654
ACSL6	0.000272	0.000566	4.69029
LOC107986554	2.13e-05	5.12e-05	1.73864
NAPSA	2.34e-05	5.6e-05	-2.38576
SCAF4	6.8e-31	8.22e-30	7.82717
KLF11	1.44e-32	1.85e-31	2.60991
PACRGL	3.75e-06	9.86e-06	-1.4771
ADSL	2.2e-06	5.94e-06	-1.01618
RHCE	0.0002	0.000423	-4.7123
INO80	2.94e-10	1.14e-09	-2.22738
CYTH2	1.65e-31	2.04e-30	1.29088
ACYP2	1.07e-10	4.3e-10	1.8627
FKRP	1.33e-27	1.41e-26	2.04945
IQSEC2	6.02e-34	8.12e-33	8.32909
DMTN	4.63e-12	2.07e-11	6.50549
HOXB8	6.41e-10	2.42e-09	2.10156
ASPH	4.25e-07	1.24e-06	1.11295
HELLS	5.9e-79	2.45e-77	-9.8259
INCENP	1.14e-67	3.87e-66	1.16497
ENGASE	2.4e-35	3.41e-34	-8.35749
MASTL	6.49e-16	3.77e-15	1.1076
DMTN	8.34e-25	7.83e-24	1.10975
RASSF6	1.86e-33	2.46e-32	1.8129
CORO6	2.22e-09	8.03e-09	-6.03015
FGFBP1	0	0	-1.67056
HELQ	0.000217	0.000458	4.731
LYL1	1.49e-13	7.44e-13	-4.5895
FES	0.000129	0.000282	4.82069
ZNF615	5.15e-13	2.47e-12	-6.59823
C14orf93	9.76e-23	8.28e-22	7.61572
ZNF862	2.22e-16	1.33e-15	2.5202
CDV3	1.22e-16	7.44e-16	1.11654
OSGEPL1	5.03e-06	1.3e-05	1.16009
USB1	3.23e-27	3.38e-26	-7.89137
FAM234A	8.39e-08	2.63e-07	5.74763
PRXL2C	1.67e-05	4.06e-05	-1.27104
NBPF3	0.000253	0.000529	-4.66985
IRF3	2.63e-05	6.26e-05	-1.44697
XAF1	1.37e-15	7.81e-15	6.95299
KCNG1	8.81e-11	3.57e-10	-6.27165
CANT1	3.31e-35	4.67e-34	8.39452
NUAK2	6.92e-25	6.52e-24	1.20912
MELK	1.37e-09	5.05e-09	-6.06836
NOD1	5.77e-06	1.48e-05	-5.2415
IGFL1	0	0	-6.27941
MSH6	3.99e-37	6.02e-36	8.49001
TRANK1	4.51e-12	2.02e-11	-6.46771
PGAP3	4.88e-36	7.13e-35	-4.30407
ZFP30	4.21e-05	9.78e-05	1.64017
PEAR1	3.82e-07	1.12e-06	5.59366
FSD1L	5.04e-14	2.6e-13	-6.72804
C6orf48	1.6e-12	7.41e-12	6.5708
PRIMPOL	2.06e-05	4.97e-05	2.41136
FANCI	1.09e-84	4.97e-83	1.15669
ZNF41	4.88e-14	2.51e-13	-3.27373
MTERF4	0.000106	0.000234	-1.33069
TACC2	1.67e-06	4.57e-06	2.07937
HTR3B	3.91e-05	9.12e-05	1.1227
SPIRE2	4.75e-12	2.12e-11	-1.17776
MAPRE1	7.41e-06	1.88e-05	-1.08721
STYK1	3.99e-13	1.93e-12	6.65283
SAMD4A	4.2e-20	3.11e-19	1.85651
TDP1	1.46e-31	1.81e-30	-2.29624
RMDN1	2.54e-12	1.15e-11	2.11743
NELL2	6.66e-14	3.4e-13	1.0122
CCNQ	2.5e-07	7.48e-07	-1.82994
TRAF1	1.55e-22	1.3e-21	1.51895
FBXL15	4.02e-05	9.36e-05	1.56009
FBXO4	8.94e-08	2.79e-07	-1.37449
MYO19	1.39e-17	8.97e-17	7.16342
PAQR6	3.6e-13	1.75e-12	6.6587
BIRC6	1.17e-17	7.55e-17	-1.93701
SETBP1	1.79e-26	1.81e-25	-7.84223
SLC37A3	5.44e-26	5.38e-25	1.82404
ST7L	3.23e-05	7.61e-05	1.016
EXOG	1.23e-06	3.4e-06	-5.42874
AIF1L	2.98e-80	1.27e-78	1.03215
ASAP2	2.71e-13	1.32e-12	-6.63519
SNRK	3.8e-10	1.46e-09	-6.16636
ZNF680	3.64e-08	1.18e-07	-5.78957
DUSP23	4.3e-29	4.83e-28	1.11897
DHRS2	5.59e-34	7.55e-33	-1.00602
SLC6A15	6.48e-21	5.02e-20	-7.42646
AKIP1	7.02e-33	9.14e-32	1.52775
RGS3	3.74e-06	9.82e-06	-5.29619
GOLGA8H	6.54e-06	1.67e-05	1.57391
EIF4E2	2.66e-08	8.72e-08	1.41275
MADD	4.09e-05	9.5e-05	-1.65445
HNRNPM	1.71e-13	8.51e-13	6.70086
DHRS4L2	3.24e-06	8.57e-06	-1.53064
ARHGEF10L	4.13e-05	9.6e-05	1.98024
ZNF532	7.01e-05	0.000158	-5.02742
DHX58	1.58e-05	3.86e-05	-1.392
UBL7	2.75e-07	8.17e-07	-5.59154
PRRC2C	1.44e-44	2.72e-43	1.19102
CDK5RAP1	1.62e-73	6.13e-72	-1.83884
HHAT	0.000131	0.000285	4.81859
PXK	2.07e-05	4.99e-05	-1.69482
EWSR1	1.21e-18	8.26e-18	-7.22486
SLC37A2	4.59e-07	1.33e-06	-5.53747
SRGAP2	2.56e-49	5.57e-48	-1.23444
CFAP74	8.12e-05	0.000182	1.54725
SLC38A1	1.28e-24	1.19e-23	-7.71378
ERMARD	2.1e-09	7.59e-09	6.07286
CAPN15	2.21e-07	6.64e-07	2.03884
MX2	2.78e-06	7.42e-06	-5.33223
DTX2	5.18e-21	4.04e-20	7.47652
MEGF6	9.11e-07	2.56e-06	1.30099
SMARCAD1	1.37e-28	1.51e-27	-1.53163
MOB3A	5.94e-36	8.64e-35	1.01327
STK33	1.53e-08	5.14e-08	-2.64114
DUS3L	5.82e-27	6.01e-26	-1.73698
PTPRS	1.83e-63	5.68e-62	1.56549
SIRPA	2.57e-07	7.67e-07	-5.59852
PDE9A	5.29e-07	1.53e-06	-5.52226
SNAP47	6.48e-52	1.51e-50	-3.57369
PELI1	9.73e-05	0.000215	1.77237
PPP1R13B	2.47e-18	1.66e-17	7.23691
TACC2	3.78e-11	1.58e-10	4.9833
TSPOAP1	7.62e-08	2.4e-07	5.75696
SLC2A10	8.47e-22	6.86e-21	1.0848
PTPN3	1.8e-09	6.56e-09	6.08512
C17orf53	1.09e-10	4.4e-10	2.60513
TOM1L1	2.77e-12	1.26e-11	-6.49789
APTX	5.19e-13	2.49e-12	2.64017
KMT5B	2.85e-22	2.36e-21	-7.53702
ENTPD1	3.48e-13	1.69e-12	-2.00325
STRN3	6.41e-25	6.05e-24	1.18811
ZDHHC16	8.48e-06	2.14e-05	-5.19159
OTUD6B	6.83e-12	3.01e-11	-1.09822
GMEB1	2.37e-07	7.1e-07	5.64367
OBSCN	1.28e-06	3.53e-06	2.10012
B3GALNT1	1.42e-25	1.38e-24	-7.78103
CDC45	4.16e-05	9.66e-05	-1.58704
NCBP1	1.22e-09	4.52e-09	-2.41103
YY1AP1	6.68e-10	2.52e-09	6.16239
SNAP91	5.43e-05	0.000124	4.96133
ENDOV	2.88e-05	6.82e-05	5.05693
EDRF1	7.38e-05	0.000166	1.07105
CDKN2A	0.000116	0.000253	-1.10866
SPIRE2	7.97e-15	4.33e-14	-6.82472
STX16	5.43e-42	9.53e-41	-1.09954
CPLANE1	2.78e-12	1.26e-11	-2.50133
BTN2A2	2.71e-06	7.23e-06	5.37137
CLCN2	1.64e-08	5.49e-08	2.05913
MIOS	3.3e-24	3.01e-23	-7.89592
WDR81	6.73e-18	4.41e-17	7.19468
ZNF345	5.29e-06	1.37e-05	-5.2526
ZBTB41	1.88e-24	1.73e-23	-7.70181
CEP170	8.37e-05	0.000187	-1.06786
EVPLL	2.74e-07	8.16e-07	1.5984
RPH3AL	9.84e-07	2.76e-06	2.71818
FARP1	7.95e-17	4.89e-16	7.08643
ACD	5.95e-34	8.03e-33	-8.28542
LIN9	1.1e-19	7.99e-19	-7.31997
LOC107985246	1.12e-14	6.03e-14	1.39231
TNNI1	2.69e-13	1.32e-12	1.22677
PRDM2	0.000155	0.000333	-4.75666
INPP4B	8e-06	2.02e-05	-5.19926
ZNF33A	5.09e-18	3.36e-17	6.09136
CDAN1	6.95e-08	2.2e-07	1.50798
LYAR	1.46e-07	4.48e-07	5.69258
ZNF445	2.76e-05	6.55e-05	5.06315
TUT4	3.83e-08	1.24e-07	1.57943
TRDMT1	9.49e-09	3.25e-08	2.81466
LOC112267992	8.87e-37	1.33e-35	-2.11074
DISP1	1.59e-06	4.34e-06	5.43504
BRPF3	1.93e-41	3.34e-40	-8.64379
ARMCX5-GPRASP2	7.84e-07	2.22e-06	-1.5295
PRSS23	1.18e-12	5.5e-12	6.58936
ASIC1	2.02e-19	1.44e-18	-7.29637
TRNT1	1.66e-17	1.06e-16	-7.11475
PEX5	3.5e-08	1.14e-07	-5.79312
RHOT1	0.000109	0.000239	11.2715
PLEKHG6	7.65e-43	1.38e-41	3.22245
PTPRH	1.6e-54	3.97e-53	2.42833
TCF7	1.9e-06	5.17e-06	5.41366
STOML1	1.19e-13	5.97e-13	1.27596
PEAK1	3.52e-20	2.62e-19	-7.36365
LOXL4	4.02e-131	3.31e-129	1.17163
POLR1B	0.000299	0.000618	4.67299
GPSM2	0.000234	0.000492	1.485
ARPC5	3.1e-05	7.3e-05	1.66569
CDC14B	3.25e-63	1e-61	4.23657
C4orf19	2.35e-15	1.32e-14	-1.99793
RARS2	4.86e-05	0.000112	4.97834
STK36	5.05e-11	2.09e-10	-13.2965
KIAA1586	4.07e-28	4.41e-27	7.99236
CYP2R1	1.68e-05	4.09e-05	5.134
KYAT1	1.57e-11	6.73e-11	6.42749
ARHGAP31	1.33e-13	6.68e-13	1.97984
ADGRG1	4.91e-14	2.53e-13	-2.28684
KDM2B	8.94e-09	3.06e-08	5.95228
FTSJ1	1.7e-15	9.66e-15	-6.90176
ZNF263	4.48e-25	4.26e-24	7.78891
ABCA1	1.71e-18	1.16e-17	-7.21069
SCML1	2.31e-28	2.53e-27	3.41706
EPHB6	0.000356	0.000729	4.64012
PMPCA	2.25e-10	8.82e-10	6.24356
UPF3A	4.46e-17	2.79e-16	7.11234
PPIP5K2	0.000216	0.000456	-4.69829
R3HDM2	2.99e-05	7.06e-05	-5.01675
SNAPC4	2.16e-16	1.29e-15	1.50876
AP1G2	8.96e-06	2.25e-05	1.02946
ZNF180	5.65e-16	3.29e-15	-6.95486
CREM	3.72e-13	1.81e-12	-6.61697
DDX11	6.93e-07	1.97e-06	-1.27996
RPUSD1	7.64e-67	2.56e-65	-1.25352
PLA2G6	6.11e-05	0.000139	2.34589
SNX14	1.38e-10	5.51e-10	-6.24001
CAPG	9.56e-15	5.17e-14	2.40458
ST3GAL5	3.2e-05	7.54e-05	1.81683
MNT	1.23e-09	4.56e-09	6.1149
TMEM200B	1.79e-15	1.02e-14	1.15565
TIA1	0.000128	0.000279	-1.16278
USP48	1.12e-08	3.79e-08	-1.10336
TIMP2	0	0	2.89318
ING4	1.39e-08	4.7e-08	2.17932
SPATA7	2.28e-07	6.83e-07	5.64781
CCDC171	6.52e-10	2.47e-09	-3.18205
ALG13	6.92e-08	2.19e-07	1.27506
ETV4	1.12e-61	3.35e-60	-2.90533
NPEPL1	1.49e-07	4.54e-07	-5.6543
REEP1	0.000112	0.000246	4.84459
SNCA	1.66e-21	1.32e-20	2.36059
EPB41	1.57e-10	6.23e-10	1.73148
RHOT2	3e-14	1.57e-13	-1.08277
ARHGEF9	2.36e-06	6.33e-06	1.95931
CHD9	4.81e-21	3.76e-20	1.35548
HEATR5B	2.42e-12	1.1e-11	-6.50626
ETV6	2.78e-42	4.92e-41	1.52309
FOXO3	1.21e-32	1.56e-31	2.04424
AVL9	6.16e-07	1.77e-06	-5.50564
GPHN	8.61e-13	4.06e-12	-1.05875
RBFOX2	2.93e-34	4e-33	-8.30155
CDSN	2.62e-05	6.24e-05	2.97583
NPIPA7	2.55e-05	6.08e-05	-2.11334
SHROOM1	1.59e-06	4.35e-06	-1.10096
TPRKB	5.85e-22	4.78e-21	-1.29365
ZNF516	2.11e-08	6.98e-08	1.23254
CLYBL	1.96e-07	5.91e-07	1.90347
HFE	2.01e-06	5.43e-06	-5.37148
MCPH1	2.15e-05	5.17e-05	-2.35975
HSCB	2.55e-35	3.61e-34	-2.70625
CFI	5.73e-38	8.89e-37	8.53045
TTC8	2.23e-08	7.35e-08	-1.2234
ABI2	1.7e-07	5.15e-07	1.47068
CSPP1	9.12e-09	3.13e-08	-1.66321
STAMBPL1	5.48e-19	3.82e-18	7.29839
SNTA1	6.03e-19	4.2e-18	-7.25297
ARL13B	0.000141	0.000306	4.80595
OSGEPL1	4.43e-08	1.43e-07	3.20716
MAP4	1.11e-12	5.2e-12	-6.55313
HERC3	0.000232	0.000489	4.71868
TTC31	1.64e-34	2.26e-33	1.98067
PRDM11	4.71e-21	3.68e-20	7.48001
PRDM8	5.15e-10	1.96e-09	6.18209
AGAP4	4.25e-15	2.35e-14	-3.46708
SIK3	2.34e-37	3.57e-36	-3.17203
PAK1	3.12e-05	7.34e-05	-5.01065
CCHCR1	1.69e-06	4.6e-06	-1.34986
IDUA	4.52e-09	1.59e-08	2.36801
ZC3HAV1L	2.04e-12	9.37e-12	1.23436
NYAP1	1.1e-28	1.22e-27	1.58522
RUNX1T1	5.23e-05	0.00012	3.80927
KIZ	1.34e-09	4.95e-09	3.13104
APTX	9.41e-06	2.36e-05	-1.10888
2021-09-01	2.17e-09	7.84e-09	6.07022
MECOM	4.22e-08	1.36e-07	-1.36388
PLD1	6.47e-47	1.31e-45	-2.23272
COA1	3.05e-11	1.28e-10	6.38313
ZNF660-ZNF197	3.93e-09	1.39e-08	1.86381
VPS26C	8.13e-06	2.05e-05	-1.07125
STXBP6	2.61e-07	7.79e-07	-5.59678
KIDINS220	1.61e-08	5.38e-08	-5.86339
USP54	1.95e-05	4.71e-05	1.29224
DTX2	1.44e-11	6.19e-11	1.95412
KBTBD3	3.77e-06	9.91e-06	2.49904
GTDC1	6.28e-08	1.99e-07	-3.10829
AMIGO2	7.81e-92	3.97e-90	2.54368
FUOM	4.63e-06	1.2e-05	-5.26947
SGSM3	2.19e-35	3.11e-34	8.40364
CRIP2	3.56e-05	8.34e-05	5.02546
CREBZF	2.63e-12	1.19e-11	1.54122
CPAMD8	2.67e-10	1.04e-09	1.90435
MLLT10	3.73e-06	9.79e-06	1.02899
MAN1B1	6.11e-06	1.57e-05	-1.22834
FUOM	1.01e-07	3.12e-07	5.72988
KIAA2026	7.5e-06	1.9e-05	-5.20765
CYB5RL	5.1e-11	2.11e-10	6.3483
ZBTB14	9.87e-18	6.4e-17	-7.13709
SLC8A1	1.39e-05	3.42e-05	-2.96448
ANKRD6	1.05e-09	3.9e-09	6.12766
BNIP1	2.43e-10	9.53e-10	2.56751
CYB5D2	2.68e-12	1.22e-11	2.86281
CDR2L	2.17e-47	4.47e-46	1.784
CAPN5	7.34e-07	2.09e-06	-5.48633
THBS3	1.05e-10	4.23e-10	2.41711
GCA	1.55e-06	4.24e-06	1.9097
PTPRM	2.01e-11	8.59e-11	2.76401
FAM227B	3.05e-06	8.1e-06	-5.32102
ZNF562	6.92e-42	1.21e-40	1.10693
ZNF280D	6.24e-07	1.79e-06	5.54058
CEP97	1.59e-25	1.55e-24	1.12585
TRAM1	4.01e-12	1.8e-11	6.51459
EZH2	4.24e-16	2.49e-15	-1.803
FMNL1	1.32e-06	3.65e-06	-5.42023
ABCA7	4.3e-06	1.12e-05	1.7914
MKNK1	1.16e-05	2.89e-05	-5.14943
FBH1	6.99e-09	2.42e-08	6.12893
LNPK	1.45e-20	1.1e-19	7.43862
EIF2D	1.14e-06	3.17e-06	1.5997
CNOT2	2.3e-09	8.31e-09	6.06536
BBX	3.61e-05	8.45e-05	1.23678
ZBTB21	1.3e-08	4.38e-08	5.91988
UNC13B	1.17e-16	7.1e-16	-1.17372
IGF2BP2	6.1e-06	1.56e-05	5.26989
ENOPH1	4.73e-24	4.29e-23	-1.58776
DGKA	0.000392	0.000797	2.32517
ALG9	1.56e-07	4.76e-07	5.68627
MED16	1.6e-51	3.67e-50	1.15025
CELF1	0.000346	0.000711	-1.05169
ZNF444	3.21e-08	1.04e-07	2.304
LITAF	1.45e-54	3.6e-53	3.71287
TBC1D5	2.45e-19	1.74e-18	-7.28884
CCNT2	2.04e-18	1.38e-17	-7.20327
PIGG	7.74e-17	4.76e-16	2.19509
WDSUB1	5.51e-06	1.42e-05	-5.24743
PPP1R12A	1.55e-22	1.3e-21	-2.81799
CGRRF1	1.47e-08	4.96e-08	5.90858
RASA3	9.09e-05	0.000202	-4.84541
EXPH5	1.92e-14	1.01e-13	1.56727
P4HA2	1.63e-05	3.98e-05	2.88027
KCNAB2	7.86e-07	2.23e-06	1.45264
PGPEP1	8.12e-06	2.05e-05	5.23258
VPS13B	4.31e-31	5.25e-30	8.17176
ABCA1	1.49e-17	9.59e-17	2.05178
OAT	0	0	1.14097
FAM168B	1.29e-19	9.29e-19	-7.31397
RASSF8	8.16e-14	4.15e-13	1.29317
SLC34A3	6.65e-05	0.00015	-4.8954
SOCS4	3.87e-71	1.41e-69	-2.78118
COL25A1	8.45e-05	0.000189	4.89123
R3HCC1L	4.81e-09	1.69e-08	1.21032
SERAC1	6.25e-15	3.42e-14	-6.83707
KLHDC4	9.16e-07	2.58e-06	-3.5721
ZNF418	2.21e-08	7.29e-08	-5.8351
AGPAT3	5.28e-55	1.33e-53	9.2043
PPP6R2	8.53e-08	2.67e-07	5.74597
SEMA4A	7.34e-30	8.54e-29	-8.05616
HDAC11	0.000221	0.000467	-4.69395
NRP2	2.42e-17	1.54e-16	-7.09822
KRT4	0	0	-5.29454
TRMU	1.43e-06	3.93e-06	5.4473
ARIH2	5.16e-11	2.13e-10	-1.04056
CCDC22	2.89e-10	1.13e-09	1.85331
SKP2	1.33e-97	7.32e-96	-1.21832
CNTN5	0.000434	0.000879	-4.56921
PM20D2	5.32e-09	1.86e-08	1.99202
NAP1L1	1.6e-38	2.53e-37	-8.51213
VRK2	8.94e-36	1.29e-34	-7.72045
APTX	6.79e-05	0.000153	-1.2234
OBSCN	4.76e-08	1.53e-07	5.80171
CAMK2D	0.000175	0.000374	2.08876
ARSG	3.67e-07	1.08e-06	5.59795
GPR137B	0.000172	0.000368	-2.01669
D2HGDH	2.05e-06	5.56e-06	5.4046
COQ10B	9.56e-17	5.85e-16	1.63837
TUT4	1.28e-43	2.36e-42	2.34499
FER	7.18e-11	2.93e-10	1.64463
SINHCAF	5.09e-115	3.46e-113	1.64077
AP1G2	4.31e-13	2.08e-12	6.64841
CUL7	4.15e-16	2.44e-15	7.01016
SMOX	4.77e-26	4.73e-25	-1.958
IRF5	6.22e-05	0.000141	-4.90575
ATP6V1FNB	1.84e-05	4.46e-05	1.54419
SIRT7	6.04e-05	0.000137	-1.64764
CPS1	2.41e-08	7.95e-08	2.13101
CBLB	1.15e-14	6.21e-14	2.01193
CEP152	3.01e-48	6.38e-47	-2.90804
KANK1	1e-05	2.51e-05	-2.25205
CNOT2	7.35e-29	8.21e-28	-3.26226
COP1	4.06e-10	1.56e-09	1.58014
RALGDS	4.58e-18	3.03e-17	7.21096
AGRN	4.42e-09	1.56e-08	-1.00379
ALG3	2.7e-17	1.71e-16	-2.56887
SMG5	3e-09	1.07e-08	1.35081
NASP	4.71e-23	4.06e-22	1.82576
PPME1	1.41e-19	1.02e-18	7.35211
RNF112	0.000282	0.000586	-1.08394
CDC16	7.01e-13	3.33e-12	-1.00656
NEK1	1.41e-14	7.56e-14	6.83554
CAMTA1	5.62e-05	0.000128	3.32775
R3HDM2	2.21e-07	6.65e-07	5.65076
ABHD17B	0.000149	0.000321	-1.36104
VPS13C	1.55e-14	8.24e-14	1.27757
IKBKE	2.91e-37	4.41e-36	3.03821
LBR	1.06e-25	1.04e-24	-2.08023
CAPZB	1.11e-08	3.77e-08	1.62252
ALG13	1.52e-08	5.1e-08	-2.61224
VRK3	3.72e-06	9.78e-06	-1.70601
CHD3	5.14e-61	1.51e-59	9.39496
NAT9	4.25e-09	1.5e-08	1.14016
CXCR2	2.5e-09	8.99e-09	2.4906
ZNF181	1.75e-06	4.78e-06	5.42335
ZNF566	8.05e-07	2.28e-06	12.2106
PHYKPL	0.000235	0.000493	-5.68387
BRD9	5.86e-10	2.22e-09	-1.64065
FUK	9.3e-10	3.47e-09	6.13695
PLEKHH1	4.93e-25	4.68e-24	3.52105
CKAP2	1.66e-32	2.13e-31	1.0012
LHPP	8.3e-130	6.75e-128	1.48302
STRBP	1.02e-05	2.54e-05	-5.16753
SLC44A5	0.000214	0.000452	1.28781
PTGES3L	6.24e-06	1.6e-05	1.77537
BRIP1	0.00011	0.000242	4.84768
ARRDC3	5.11e-08	1.64e-07	5.31893
CEP120	1.67e-39	2.72e-38	1.8861
GNAZ	8.71e-05	0.000194	-4.85224
CUL9	2.17e-14	1.14e-13	-6.77295
IQCH	2.19e-05	5.27e-05	5.09641
SLC35C2	1.34e-27	1.42e-26	-3.90653
ANKAR	3.43e-05	8.04e-05	-4.99663
GRHL3	0.000154	0.000331	2.69161
SNX7	4.54e-09	1.6e-08	-1.07493
ZSCAN30	1.16e-12	5.44e-12	6.58998
AP3B2	3.37e-08	1.09e-07	-1.05894
ZSCAN9	5.71e-13	2.73e-12	1.13812
TRABD2B	8.27e-07	2.34e-06	2.4826
C1orf109	2.39e-05	5.7e-05	5.08425
JPH1	9.12e-18	5.93e-17	-7.14049
UBE2L3	4.66e-33	6.1e-32	-1.38986
GDA	1.38e-12	6.42e-12	-7.19129
ARHGAP26	0.000298	0.000616	-3.1164
LHX1	2.53e-45	4.89e-44	1.91614
SLC20A2	6.09e-10	2.3e-09	-6.13109
ARID5A	4.9e-28	5.29e-27	2.42169
RABEP1	6.42e-29	7.18e-28	-3.36574
FAM111A	1.63e-161	1.73e-159	6.16733
CDC25C	2.36e-06	6.33e-06	-5.35233
RSRP1	2.21e-10	8.68e-10	1.63806
TANC1	5.72e-07	1.65e-06	1.33988
ACBD5	3.69e-10	1.42e-09	-2.30696
DDX55	3.91e-08	1.26e-07	-5.78295
GUCY1B1	1.18e-08	3.99e-08	-5.89066
TACSTD2	0	0	1.44304
KCP	1.51e-05	3.7e-05	1.3458
DDX11	1.36e-09	5e-09	-6.0692
CCDC88B	0.000306	0.000633	-4.83112
RAP1GAP2	9.85e-20	7.16e-19	7.366
E2F3	2.29e-25	2.21e-24	7.80938
TRPV3	6.46e-10	2.44e-09	2.44196
PRIMPOL	0.000199	0.000422	-1.74308
ATG16L2	1.63e-05	3.99e-05	1.29119
GIT2	1.5e-05	3.67e-05	10.3882
ATP6V1C2	7.04e-11	2.88e-10	-6.28722
RPA2	1.42e-05	3.49e-05	-5.12223
SMIM14	1.38e-33	1.85e-32	1.60402
SMARCA2	4.94e-10	1.88e-09	6.18535
PCM1	3.12e-05	7.34e-05	5.04533
UBE4B	1.06e-07	3.28e-07	5.72485
PPM1A	1.54e-06	4.22e-06	1.13775
TRPC4AP	9.86e-16	5.68e-15	6.96892
AFAP1L2	1.43e-09	5.27e-09	-2.17975
TP53I13	2.76e-08	9.05e-08	-5.81477
SEPSECS	5.7e-13	2.72e-12	-1.49916
SLC29A4	4.17e-07	1.22e-06	-5.54773
SCAPER	0.000218	0.00046	2.33082
ADSSL1	3.96e-30	4.66e-29	1.17014
SLAMF8	0.000372	0.000761	1.2111
GGT1	7.2e-09	2.49e-08	5.97081
CARS2	1.04e-35	1.5e-34	-2.09435
RPS6KC1	3.88e-12	1.74e-11	6.51653
NET1	0	0	2.06953
NDEL1	0.0002	0.000423	-1.02031
R3HCC1L	5.63e-30	6.58e-29	3.17758
APOL3	2.88e-10	1.12e-09	1.39365
RALGAPA1	4.97e-22	4.07e-21	-7.51782
LCTL	0.000172	0.000369	4.77167
MICALCL	1.06e-47	2.21e-46	1.25219
ZNF142	2.12e-09	7.66e-09	-6.03402
ST3GAL4	3.56e-26	3.55e-25	2.04624
FAM49B	2.56e-14	1.35e-13	-3.32884
NIPAL2	8.11e-24	7.26e-23	2.39012
SUPT20H	4.42e-05	0.000102	-1.29083
LRRFIP2	6.62e-05	0.00015	-1.9021
BAZ2B	1.66e-09	6.07e-09	9.31402
ZFP69	4.81e-12	2.15e-11	1.25635
CDK5RAP3	1.14e-21	9.15e-21	-7.48884
TMBIM1	6.47e-22	5.27e-21	1.2926
JADE2	4.28e-45	8.22e-44	-1.07334
GOLGA3	6.94e-102	4.09e-100	3.41525
GDF9	0.000274	0.00057	-4.65542
UFM1	7.97e-19	5.51e-18	7.28326
CELF1	1.55e-05	3.8e-05	-1.05833
HIC1	6.33e-13	3.02e-12	-6.58628
FAM13A	4.45e-10	1.71e-09	6.19306
ZNF708	7.41e-12	3.26e-11	3.03387
HGS	9.91e-53	2.36e-51	9.12697
NCAM2	2.31e-10	9.07e-10	3.34059
N4BP2	1.54e-50	3.45e-49	9.04935
TUBGCP2	7.4e-29	8.26e-28	1.5326
LIN9	3.61e-43	6.55e-42	-1.44754
PIGN	2.95e-20	2.2e-19	-2.16248
AP2M1	8.82e-05	0.000196	4.88423
DRG2	4.93e-124	3.76e-122	-1.12697
STAM	8.63e-12	3.78e-11	-6.42678
DST	3.69e-09	1.31e-08	6.02683
SPATA18	3.94e-12	1.77e-11	6.51556
PLXNB2	1.74e-23	1.53e-22	1.95785
PABPC4L	1.24e-06	3.44e-06	5.4635
UNC13A	3.75e-06	9.85e-06	5.33149
RNF19A	4.01e-11	1.67e-10	1.88096
FMNL2	7.2e-09	2.49e-08	5.97081
RHBDL1	0.000455	0.000918	1.22587
HSH2D	1.15e-34	1.59e-33	2.31658
H1F0	0	0	1.06262
CDC16	8.84e-44	1.64e-42	-2.66406
APBB2	1.4e-07	4.28e-07	-2.41289
CSF3	4.51e-32	5.71e-31	3.04475
MAPT	1.47e-12	6.81e-12	6.57608
DHX29	9.32e-21	7.16e-20	-1.15574
RNF13	4.51e-08	1.45e-07	1.36154
HOOK2	1.64e-27	1.73e-26	3.63327
ARL6	0.000217	0.000458	4.731
PTK2	9.68e-05	0.000214	1.49636
STAC	7.52e-66	2.46e-64	-2.94877
APBB3	9.83e-15	5.32e-14	6.85434
NT5DC2	0.000207	0.000438	-1.38163
PRAME	1.82e-31	2.25e-30	1.12742
RBBP4	1.15e-30	1.37e-29	-1.60115
PRPF40B	1.71e-07	5.19e-07	5.67704
CYBC1	4.43e-09	1.56e-08	-1.67835
EPB41L2	1.29e-07	3.96e-07	-3.94872
LYSMD4	7.19e-09	2.48e-08	-5.93316
RHBDF2	1.33e-05	3.28e-05	1.14102
ALG13	5.56e-08	1.77e-07	-1.72395
KCTD1	6.8e-13	3.23e-12	-1.17598
FBLIM1	4.9e-05	0.000113	1.73173
TCF4	0.000498	0.000999	1.86778
TANC2	5.04e-28	5.44e-27	2.72776
RGL1	6.54e-08	2.07e-07	5.77167
REPS2	1.9e-08	6.33e-08	1.02797
EIF4G3	9.31e-16	5.37e-15	1.62228
NEDD4L	3.61e-12	1.62e-11	1.10738
CD109	1.51e-22	1.27e-21	-1.29975
CCNI	6.95e-21	5.38e-20	7.46584
SEC24D	2.48e-06	6.65e-06	5.38206
JAM2	5.88e-05	0.000134	3.2153
CADPS2	1.15e-05	2.86e-05	-2.62311
HPS4	9.71e-11	3.93e-10	6.30364
DNAH6	0.000177	0.000377	4.76733
MZF1	7.1e-18	4.64e-17	3.38833
TNIP1	9.37e-15	5.07e-14	3.70622
IWS1	7.7e-51	1.74e-49	-1.19002
MIPOL1	2e-13	9.87e-13	-6.65235
TDRP	1.1e-23	9.79e-23	-7.64548
ZNF320	2.93e-10	1.14e-09	1.06237
DDX60L	6.34e-06	1.62e-05	-5.22955
SREBF1	1.03e-07	3.2e-07	2.17534
PPIP5K1	0.000374	0.000764	1.2724
TRMT2B	0.0001	0.000222	-1.38227
FAAP20	4.6e-07	1.34e-06	1.58389
BTN3A2	2.36e-08	7.76e-08	2.7031
CDK18	1.48e-09	5.43e-09	6.10074
TMEM214	1.27e-141	1.14e-139	-2.54016
XAF1	1.66e-88	8e-87	2.52115
FAM200B	7.3e-08	2.3e-07	1.24804
PDXK	1.84e-10	7.26e-10	2.45427
BCL2L13	9.71e-18	6.3e-17	7.17903
NAB1	1.18e-06	3.27e-06	-5.4333
IQGAP3	1.89e-09	6.87e-09	1.81474
SETD5	1.65e-22	1.38e-21	-7.55567
LMX1B	7.92e-36	1.15e-34	1.92601
RBP4	2.39e-05	5.71e-05	-1.70385
NAA16	1.4e-08	4.71e-08	1.43151
PACS2	4.2e-36	6.15e-35	1.09135
ZFX	8.14e-21	6.28e-20	-2.24353
ARHGEF7	1.3e-22	1.09e-21	-1.43412
HBS1L	7.75e-22	6.29e-21	-1.41075
FIGNL1	1.09e-39	1.8e-38	-8.5658
UFD1	1.71e-11	7.32e-11	-6.38264
RNF146	2.91e-11	1.23e-10	6.38631
TAZ	1.46e-43	2.69e-42	-2.63447
E4F1	0.000469	0.000946	1.42322
TMEM165	5.56e-05	0.000127	-2.40251
MCTP1	0.000138	0.0003	-1.08335
RNF170	3.32e-12	1.5e-11	-2.23687
OSGEPL1	7.09e-20	5.19e-19	-2.26681
SIRT5	2.63e-15	1.48e-14	6.92085
SERTAD3	7.16e-08	2.26e-07	-1.7425
MSANTD3	3.78e-13	1.83e-12	-1.1813
COPS3	4.17e-05	9.68e-05	-4.96727
MEA1	0.000147	0.000317	1.15804
DNM1	7.12e-33	9.27e-32	8.27152
AGO4	5.43e-33	7.08e-32	8.27793
RASA2	5.74e-08	1.83e-07	5.78408
BBX	6.4e-09	2.22e-08	-1.78146
SS18	3.91e-06	1.02e-05	1.5856
MGA	8.05e-15	4.38e-14	-4.29203
ZNF33B	8.83e-84	3.97e-82	3.65551
PEX5	1.92e-13	9.53e-13	1.34483
IL1RN	1.94e-14	1.03e-13	-1.25203
SCMH1	4.46e-14	2.31e-13	-3.02765
PPM1M	5.45e-33	7.11e-32	8.27783
SLC38A7	1.62e-52	3.84e-51	1.11774
CDV3	6.2e-12	2.74e-11	6.48712
SERPINB6	5.78e-13	2.76e-12	-2.30194
ATXN2L	1.03e-05	2.58e-05	5.20073
APOL2	4.83e-09	1.7e-08	2.58951
MFSD14B	1.82e-06	4.95e-06	-5.38298
SFI1	1.91e-12	8.77e-12	-3.87889
MAP4K4	2.48e-08	8.14e-08	-1.69803
NUSAP1	1.4e-27	1.48e-26	-3.05868
PEX6	0.000146	0.000316	-4.76599
PROM2	4.14e-11	1.72e-10	2.99631
USP54	4.09e-13	1.98e-12	-6.61152
PEAK1	4.84e-07	1.4e-06	1.71856
FAM173B	1.5e-12	6.94e-12	6.57484
CTPS2	7.76e-21	5.99e-20	1.04551
NPRL3	5.03e-59	1.41e-57	1.7381
STMN3	9.1e-08	2.84e-07	-5.70262
DIP2A	1.34e-05	3.31e-05	1.1108
STAG2	1.45e-10	5.77e-10	-6.23666
UBE3D	2.2e-06	5.94e-06	5.39619
PRPSAP2	0.000107	0.000235	4.85281
SYT12	4.75e-248	8.84e-246	-1.58138
HKR1	5.51e-27	5.69e-26	7.91926
ZNF567	1.59e-09	5.84e-09	-6.05658
PTK2	2.13e-12	9.75e-12	7.79386
KIAA0556	1.41e-14	7.56e-14	6.83554
ZNF793	1.44e-11	6.2e-11	1.18037
PCM1	6.1e-08	1.94e-07	-3.57166
AVL9	7.03e-12	3.1e-11	-1.77167
PLA2R1	0.000486	0.000977	9.59852
CLDN16	9.91e-31	1.19e-29	2.00599
ABCG2	2.67e-07	7.96e-07	-1.95725
PPHLN1	3.88e-43	7.03e-42	-8.71639
N4BP2L2	1.49e-07	4.54e-07	-5.6543
ABCD4	2.14e-12	9.81e-12	-3.02716
ZC3H14	6.49e-27	6.69e-26	3.64641
UVRAG	6.45e-26	6.36e-25	1.80518
DPY19L2	1.37e-06	3.78e-06	1.22835
C2CD2L	5.43e-55	1.37e-53	9.2039
SLC44A3	1.03e-25	1.01e-24	7.8336
2021-09-08	2.42e-12	1.1e-11	13.6093
NIPA2	1.13e-34	1.56e-33	-5.27499
PGAP2	7.08e-06	1.8e-05	5.25058
LNX1	3.21e-12	1.45e-11	1.14354
NDST1	3.74e-21	2.93e-20	-7.44642
AP1G2	1.35e-10	5.39e-10	-1.65741
STRBP	1.88e-06	5.11e-06	1.71205
HSCB	8.27e-12	3.63e-11	2.68763
R3HDM1	4.93e-15	2.71e-14	-1.91526
PIKFYVE	0.000137	0.000297	4.81123
LOC101930307	0.000498	0.000999	-4.54291
MAGI3	6.57e-20	4.82e-19	-1.05832
TOP3B	1.08e-07	3.35e-07	5.72261
FBXO38	1.27e-21	1.02e-20	1.26643
TRIM6	4.7e-23	4.05e-22	1.1687
TXNIP	6.54e-245	1.2e-242	3.83355
C14orf93	1.09e-08	3.71e-08	5.93496
RAB3B	2.45e-144	2.26e-142	2.13291
R3HDM1	1.63e-05	3.98e-05	-9.07129
ABCC8	1.01e-05	2.54e-05	3.49666
ZPR1	2.27e-08	7.49e-08	5.87012
C14orf28	0.00013	0.000282	2.12951
ANKZF1	0.000216	0.000456	-4.69829
TRIM66	6.14e-07	1.76e-06	5.54249
SLC25A33	2.26e-22	1.89e-21	-7.54487
ACSF3	7.34e-10	2.76e-09	-1.61114
DGKA	5.72e-15	3.14e-14	6.88197
MEMO1	4.53e-10	1.73e-09	6.19185
PPP1R1C	0.000203	0.000429	4.74321
TENT4B	1.41e-16	8.52e-16	1.05262
PNPLA8	3.05e-11	1.28e-10	6.38313
POLH	2.85e-38	4.46e-37	4.01875
TEX30	1.65e-17	1.06e-16	-1.30711
ADGRG1	4.38e-31	5.33e-30	2.69351
TEX9	8.87e-18	5.77e-17	-7.14168
ALG10B	1.18e-05	2.93e-05	-1.82323
HLA-DMB	9.49e-08	2.96e-07	1.55429
FIGNL1	4.15e-54	1.02e-52	-2.21666
MEF2A	5.69e-05	0.00013	-4.91975
LIMS1	2.3e-16	1.38e-15	-1.03049
ZNF131	1.05e-09	3.9e-09	6.12766
TP53TG3D	3.25e-05	7.64e-05	-5.00454
PCMTD2	8.12e-23	6.92e-22	2.09207
NCOR1	2.46e-09	8.85e-09	6.06004
HIKESHI	1.72e-08	5.73e-08	-5.85758
SYT1	1.01e-10	4.08e-10	1.46736
BAHCC1	5.12e-17	3.19e-16	12.9367
SMG6	1.61e-09	5.88e-09	1.56977
TMEM218	1.42e-07	4.36e-07	-2.13498
WDTC1	1.05e-46	2.12e-45	1.31964
PTAFR	2.24e-35	3.18e-34	1.24476
CNOT8	9.44e-43	1.69e-41	-3.36879
SLC45A1	5.62e-17	3.49e-16	7.10203
KIF23	2.1e-85	9.67e-84	10.0196
PSD3	2.97e-68	1.02e-66	1.09047
S100A13	3.84e-08	1.24e-07	-5.78448
BLCAP	3.5e-07	1.03e-06	1.67613
ARHGEF9	2e-09	7.24e-09	-6.03873
KLHL18	1.84e-30	2.19e-29	3.93015
CAMSAP3	8.01e-05	0.000179	-4.86581
SHC3	5.88e-10	2.23e-09	1.84946
ITGBL1	6.56e-09	2.28e-08	4.66986
INPP4A	4.7e-20	3.47e-19	-7.35268
PRPF38B	1.66e-10	6.57e-10	13.2372
NFATC4	2.24e-63	6.93e-62	1.68818
ITSN1	1.62e-11	6.95e-11	-1.11283
NAB1	1.99e-12	9.13e-12	2.07414
COQ8A	4.5e-29	5.06e-28	1.1527
CD40	3.93e-08	1.27e-07	1.80127
MAN1A1	1.74e-19	1.25e-18	-7.30226
TMEM218	1.63e-29	1.87e-28	-5.58476
CELF1	1.04e-26	1.07e-25	-2.74164
SLCO4A1	0.000101	0.000223	4.862
GPR137	4.1e-12	1.84e-11	1.90136
CNOT9	2.75e-28	3e-27	1.07807
KRBA1	3.3e-10	1.28e-09	-6.17689
ZNF30	0.000411	0.000833	1.3521
OAT	1.86e-07	5.62e-07	1.21858
ZNF771	5.13e-07	1.48e-06	5.56205
P4HA2	3.63e-07	1.06e-06	5.59917
LRRC61	7.26e-17	4.47e-16	7.09056
LMBR1L	6.42e-09	2.23e-08	1.45245
MAPKAP1	9.69e-83	4.28e-81	-4.12816
GNAO1	8.11e-144	7.42e-142	-1.36491
CSAD	5.92e-11	2.44e-10	-2.29383
TRPM2	4.01e-14	2.08e-13	6.78059
RMDN2	0.000254	0.00053	4.70285
BAP1	1.17e-79	4.92e-78	-1.22607
RCOR3	6.79e-19	4.71e-18	7.28971
USP45	1.27e-08	4.3e-08	1.34465
RPS29	8.99e-22	7.26e-21	1.11383
CHD1L	5.26e-08	1.68e-07	-1.05106
MPDZ	1.97e-10	7.76e-10	1.33065
HERC4	5.54e-43	1e-41	8.7547
GAPVD1	7.16e-12	3.16e-11	-1.01488
RTKN	1.3e-07	4e-07	2.53659
SLC25A36	1.97e-23	1.73e-22	7.66892
MCOLN3	5.18e-06	1.34e-05	-2.21032
HAGHL	1.8e-05	4.36e-05	5.1247
CMPK1	2.35e-11	9.99e-11	-1.622
NPR1	9.54e-05	0.000211	1.05515
RPS6KA5	5.89e-23	5.05e-22	-2.30595
CBR4	1.59e-10	6.31e-10	1.83748
ZFYVE28	4.83e-05	0.000111	4.97928
IMMP1L	5.59e-07	1.61e-06	5.55262
CCDC130	3.39e-30	3.99e-29	-4.79566
INTS4	1.07e-05	2.67e-05	-1.43855
TUT7	5.02e-15	2.76e-14	-6.8481
DPH7	0.000177	0.000378	-4.7336
DAW1	0.00022	0.000463	-2.0014
IKBKG	2.93e-27	3.07e-26	1.52546
WDSUB1	0.000157	0.000338	1.53565
KLHL2	3.37e-14	1.76e-13	-6.74962
RHOT1	1.18e-23	1.05e-22	-3.2489
RIOX2	8.52e-50	1.88e-48	-8.97696
AHDC1	1.58e-10	6.27e-10	1.95162
ASB9	1.75e-15	9.92e-15	6.94099
MYLK	3.71e-07	1.09e-06	2.55432
HPS1	1.52e-19	1.09e-18	-7.3076
ZFP1	1.25e-05	3.1e-05	1.40015
MRTFB	3.33e-05	7.82e-05	1.78639
RHEBL1	4.45e-08	1.43e-07	5.80806
SLC25A19	1.99e-27	2.1e-26	-1.73582
CDK1	0.000289	0.000599	1.58036
LRRFIP1	8.84e-18	5.75e-17	4.07548
CYSLTR1	1.18e-120	8.6e-119	10.672
ANK2	0.000295	0.000611	4.67531
TMEM259	4.82e-112	3.19e-110	1.11987
ARMCX5	8.39e-13	3.97e-12	-1.00298
MKNK1	4.96e-15	2.73e-14	-1.92433
STIL	2.98e-19	2.11e-18	7.32263
ZNF780A	0.000225	0.000475	-4.69069
ATP6V1H	0.000241	0.000506	4.71192
CC2D2A	1.57e-21	1.25e-20	7.5196
PBRM1	5.76e-09	2.01e-08	-2.00724
C18orf54	7.12e-07	2.03e-06	1.9707
SLIT2	1.49e-14	7.93e-14	-6.79262
ACSS1	2.5e-05	5.97e-05	1.54919
PRIMPOL	1.34e-07	4.12e-07	-1.14265
MPP5	2.65e-13	1.3e-12	6.67618
PIH1D1	2.06e-27	2.17e-26	5.6391
PHF21A	6.09e-05	0.000138	1.84205
TM2D2	6.76e-06	1.72e-05	1.98276
EIF4G3	1.1e-09	4.08e-09	1.53761
EGF	3.07e-05	7.24e-05	2.03229
HPS5	3e-10	1.17e-09	-1.94867
PCED1B	6.76e-07	1.93e-06	2.06446
HECTD1	6.29e-16	3.66e-15	6.9905
RHBDF1	1.46e-12	6.79e-12	1.74304
DMTN	1.55e-12	7.19e-12	6.57266
BTN2A2	7.02e-13	3.34e-12	1.47438
EPB41L2	2.91e-05	6.9e-05	5.05515
ANKRD36	6.37e-05	0.000144	4.93641
KLF8	1.63e-05	3.99e-05	2.69876
ZNF512	1.33e-15	7.59e-15	6.95443
STT3A	6.67e-18	4.37e-17	1.91924
FAM214A	9.1e-21	7e-20	7.45593
EFHC1	7.06e-18	4.62e-17	2.31754
FRMD5	6.15e-06	1.58e-05	-5.2333
TNFRSF14	2.24e-19	1.59e-18	8.7103
FAM222B	1.27e-08	4.3e-08	1.08894
ARHGEF12	1.29e-68	4.5e-67	1.99359
NIN	1.02e-19	7.42e-19	7.36456
NDRG2	0.000314	0.000647	-4.63066
POMT1	6.03e-09	2.1e-08	1.34538
TP53I13	6.65e-06	1.7e-05	-1.6974
SMAD5	8.17e-13	3.86e-12	-1.04852
SETD6	6.1e-05	0.000139	1.38575
MDM1	1.58e-07	4.82e-07	-1.43333
HEATR3	0.000134	0.000291	1.62075
KIF23	1.21e-66	4.05e-65	1.67673
SIKE1	1.28e-49	2.8e-48	-1.54205
TMEM94	1.24e-07	3.8e-07	-1.30272
MSH6	2.49e-47	5.11e-46	-3.54142
MOXD1	4.02e-14	2.08e-13	-2.11247
ZNF682	0.000259	0.00054	4.69944
TANGO2	4.39e-14	2.27e-13	-3.77012
GSKIP	6.79e-29	7.6e-28	-7.99762
EIF4G3	8.66e-20	6.31e-19	-7.32926
PPP2R2A	1.4e-08	4.72e-08	5.91301
MUTYH	3.43e-05	8.05e-05	5.03091
ACVR1	7.09e-18	4.64e-17	7.19246
CCDC130	8.13e-12	3.57e-11	6.46986
NFASC	1.41e-07	4.33e-07	5.34785
TTLL7	5.55e-06	1.43e-05	11.8882
ALOX12B	2.11e-08	7e-08	1.73767
SNX24	1.69e-11	7.23e-11	-3.07089
ZFP62	2.14e-09	7.75e-09	1.3384
CDC42BPA	1.84e-49	4.02e-48	-1.31135
PEX11A	1.14e-19	8.23e-19	1.46081
BCAR1	0.000218	0.000461	4.72988
MCOLN2	2.76e-29	3.13e-28	2.8477
ST6GALNAC1	6.21e-08	1.97e-07	5.77654
NIPAL3	1.22e-24	1.13e-23	-3.12967
TBL1XR1	6.2e-14	3.17e-13	-1.92054
MYO3B	3.11e-28	3.39e-27	1.83819
AMPD3	1.68e-12	7.77e-12	1.27276
MTCL1	2.15e-08	7.1e-08	6.92573
SMURF1	5.56e-08	1.77e-07	-5.74989
MAST3	2.2e-06	5.94e-06	1.68563
NHS	2.25e-26	2.26e-25	7.87858
YWHAE	2.64e-09	9.46e-09	-6.01631
RC3H1	1.25e-33	1.67e-32	1.8735
PIBF1	0.000158	0.000341	-4.7525
GDPD5	6.96e-06	1.77e-05	5.25291
KDM4C	3.77e-09	1.34e-08	3.99426
PLAGL1	1.13e-11	4.93e-11	-3.05324
KMT2B	0.000358	0.000732	1.21682
SUN2	2.66e-47	5.47e-46	-1.56248
SH3GLB1	2.03e-41	3.5e-40	-1.55168
RMND5B	7.29e-05	0.000164	4.91498
PEAR1	1.7e-08	5.69e-08	1.23156
TANGO2	1.72e-07	5.23e-07	2.17974
CLDN15	2.01e-16	1.21e-15	1.1688
ALG9	6.82e-07	1.95e-06	6.61529
TRIM16L	2.97e-23	2.58e-22	4.9919
DRAM2	4.03e-07	1.18e-06	-1.58144
PIAS1	1.27e-123	9.63e-122	1.87308
NXF1	2.09e-30	2.48e-29	-1.93089
ANKRD12	2.14e-21	1.7e-20	-7.46643
TUBB1	0.000225	0.000473	-1.04077
LRRFIP2	1.48e-12	6.87e-12	-1.16737
FAM204A	2.27e-22	1.89e-21	-7.54472
DMTF1	5.85e-11	2.41e-10	1.65826
LACC1	2.42e-12	1.1e-11	1.67173
FBXW7	1.21e-06	3.34e-06	5.46685
VMP1	7.56e-224	1.22e-221	2.49521
ANKRD20A2	6.69e-07	1.91e-06	3.30959
KIF15	4.18e-13	2.02e-12	-6.61037
HPS4	9.71e-07	2.72e-06	4.15311
GIT2	1.43e-14	7.65e-14	-3.33558
ZNF32	7.39e-06	1.88e-05	-2.07824
IMPDH2	4.55e-11	1.89e-10	-1.70274
NOL9	1.72e-05	4.18e-05	-1.93298
CDK16	1.96e-12	9.03e-12	-6.51889
FAM114A2	6.69e-05	0.000151	-1.49223
CNOT2	4.75e-31	5.77e-30	-5.66126
MAP4K4	3.83e-11	1.6e-10	6.36779
PPP4R1	1.95e-98	1.09e-96	7.89004
PLEKHN1	3.61e-23	3.13e-22	1.21685
SUPT20H	2.08e-07	6.28e-07	-1.86769
VWDE	4.66e-11	1.93e-10	1.56274
SLC25A14	8.35e-05	0.000186	-4.85904
STK24	1.85e-11	7.93e-11	-1.27572
PAK3	2.44e-06	6.54e-06	-5.3482
TTC23	1.76e-08	5.88e-08	1.66686
CXorf40A	5.1e-14	2.63e-13	-2.55441
EGR2	0.000112	0.000246	4.84459
SUPT20H	3.93e-07	1.15e-06	2.17809
CDKN2A	4.39e-16	2.58e-15	1.38277
RNASE4	2.05e-33	2.72e-32	2.20319
SLC27A1	9.62e-12	4.2e-11	6.45913
GBGT1	1.19e-12	5.55e-12	6.58875
SLC11A2	5.71e-09	1.99e-08	5.9905
ARHGAP21	2.15e-06	5.8e-06	1.91053
ZFP30	2.55e-08	8.39e-08	-1.15544
SCN5A	5.6e-05	0.000128	-5.83123
GTDC1	0.00014	0.000303	-1.15823
AQP3	2.67e-19	1.89e-18	3.3751
PRPSAP2	3.7e-09	1.31e-08	-1.40208
FAM227B	8.45e-05	0.000189	4.89123
ZNF462	4.23e-06	1.11e-05	-1.10941
NGLY1	6.3e-05	0.000143	-4.90387
RIN2	4.15e-06	1.08e-05	5.31893
DDX50	1.62e-05	3.95e-05	-2.13771
FNBP1	0.000128	0.000278	1.09287
CREBBP	7.26e-66	2.37e-64	-1.02092
GMIP	5.99e-81	2.57e-79	4.64549
GPS1	7.79e-09	2.69e-08	-5.92624
KRTAP2-3	7.3e-08	2.3e-07	2.4219
CASP8AP2	9.64e-93	4.96e-91	-1.95715
SEL1L	1.64e-79	6.86e-78	-1.2544
CHST12	2.41e-18	1.62e-17	7.23789
KLHL42	3.8e-10	1.46e-09	4.93235
CTSB	5.29e-37	7.96e-36	1.61598
TMEM116	1.23e-05	3.04e-05	-5.14228
SEMA6D	0.000471	0.000948	-4.55373
AP1G2	1.47e-28	1.62e-27	4.03666
CEP295	2.86e-22	2.37e-21	2.11847
SAMD9L	1.73e-07	5.25e-07	3.4057
MAP2K7	3.95e-30	4.64e-29	1.07979
ZC3H13	2.97e-23	2.59e-22	7.20457
FBH1	6.66e-09	2.31e-08	5.9774
TMEM260	2.8e-10	1.09e-09	-1.98665
OBSCN	3.37e-05	7.91e-05	-1.8821
ELAVL2	7.18e-05	0.000162	-2.03174
PIGG	3.71e-08	1.2e-07	-1.12097
COL16A1	5.45e-15	2.99e-14	-5.56268
HNRNPM	4.4e-22	3.61e-21	-1.22674
NUDT22	6.03e-16	3.51e-15	1.29628
SRP68	9.48e-17	5.8e-16	3.56852
SIRT6	6.96e-13	3.31e-12	1.75949
PLAG1	3.47e-25	3.31e-24	-7.75406
LOC107984974	3.74e-09	1.33e-08	-2.56923
MARK3	8.78e-48	1.83e-46	3.79376
DTX2	4.93e-31	6e-30	1.52887
ACVR2A	3.09e-11	1.3e-10	1.30559
SNX17	0.000268	0.000557	-4.65987
ZNF461	0.000354	0.000725	4.6413
R3HCC1L	2.53e-15	1.42e-14	6.92281
ZNF133	8.48e-12	3.72e-11	3.85818
MCAM	1.03e-05	2.56e-05	1.40782
ST3GAL4	1.13e-07	3.48e-07	5.71868
RBFOX2	8.16e-42	1.43e-40	3.65378
PANK2	4.27e-17	2.67e-16	7.11426
LRRC49	1.79e-09	6.52e-09	1.17744
TRPV4	1.16e-08	3.94e-08	-4.76464
BBS9	3.28e-11	1.37e-10	3.09291
CUBN	5.25e-06	1.36e-05	3.9066
VAV1	2.05e-05	4.94e-05	-5.07129
LEO1	3.04e-16	1.8e-15	-6.98402
AKTIP	8.12e-10	3.05e-09	6.14743
SREBF2	1.19e-09	4.42e-09	-6.07922
CHD9	6.14e-16	3.58e-15	2.04232
SLC25A17	2.99e-29	3.39e-28	-3.08194
AMOT	1.35e-06	3.71e-06	-3.70849
ZSWIM8	3.67e-14	1.91e-13	1.61052
SPIDR	3.36e-07	9.91e-07	5.60709
PHF21A	5.16e-16	3.02e-15	1.82502
TIGIT	7.46e-21	5.76e-20	2.26904
HDDC3	2.64e-232	4.47e-230	1.03015
TRDMT1	1.06e-06	2.97e-06	3.48071
NECTIN3	4.27e-23	3.69e-22	-1.39918
TNFRSF1B	1.39e-06	3.83e-06	3.19803
DZIP1	1.61e-13	8.02e-13	-1.69745
IKZF1	6.07e-08	1.93e-07	-5.7415
PXDC1	8.86e-10	3.31e-09	1.37185
NPHP1	0.000115	0.000252	4.84046
SESN2	1.15e-11	4.99e-11	1.7408
RECQL4	1.37e-07	4.19e-07	5.69944
STOML1	1.42e-15	8.12e-15	-6.91043
FSCN2	4.51e-17	2.82e-16	1.91421
ANK3	5.38e-05	0.000123	-4.52905
ARHGAP17	2.3e-06	6.18e-06	1.09005
RTTN	3.33e-07	9.81e-07	-5.57158
STX3	4.56e-06	1.19e-05	5.30701
BTN2A2	7.89e-05	0.000177	6.27211
HIGD1A	5.21e-09	1.82e-08	1.20689
MKS1	2.47e-09	8.9e-09	6.0596
ZNF189	9.52e-19	6.55e-18	7.27602
ENDOV	0.000232	0.000488	1.93265
PLOD2	2.16e-147	2.05e-145	1.16638
MFAP2	0.000148	0.000319	-1.4522
TNK2	2.76e-40	4.62e-39	-3.32738
ADAT2	3.39e-60	9.8e-59	1.60908
SCNN1A	0	0	1.52615
HYAL1	3.69e-10	1.42e-09	1.24034
SUGP2	2.97e-10	1.15e-09	1.91326
WDR17	6.71e-08	2.12e-07	-5.73201
RBPJ	1.45e-10	5.8e-10	-6.23628
TRADD	2.02e-18	1.37e-17	1.07534
ACAD9	0.000157	0.000339	-4.75354
PLEKHH3	4.24e-13	2.05e-12	6.64929
NIN	3.93e-13	1.9e-12	-1.0416
ZFYVE27	7.06e-37	1.06e-35	2.78065
TMEM169	0.000251	0.000525	-2.6589
KMT2C	1.29e-06	3.57e-06	5.45879
METTL8	1.14e-08	3.87e-08	-2.04312
SRRM1	0.00025	0.000524	1.53312
2021-03-01	2.3e-10	9.03e-10	-1.07252
HHAT	7.91e-05	0.000177	2.94836
ZNF207	2.63e-16	1.56e-15	-2.14034
RABGAP1L	1.16e-08	3.92e-08	1.0409
SORBS3	2.58e-35	3.66e-34	1.93452
ZFAND4	6.06e-05	0.000138	-4.23374
KRT6A	0	0	-3.46177
D2HGDH	1.45e-08	4.87e-08	-5.87254
PIF1	2.16e-05	5.19e-05	-5.06374
NR2C1	4.21e-50	9.34e-49	3.18171
ZC3H13	0.000162	0.000349	5.11268
CEP57L1	1.59e-17	1.02e-16	-3.46029
PLPP4	1.33e-05	3.28e-05	2.25833
NLRP1	1.39e-61	4.16e-60	2.37994
MIEF1	3.46e-07	1.02e-06	5.60405
KDM6B	3.41e-08	1.11e-07	1.53117
ABCC1	1.04e-74	4.04e-73	9.76984
ZNF142	8.3e-07	2.35e-06	1.0592
HIVEP1	9.14e-13	4.31e-12	6.60435
SPHK1	3.02e-25	2.89e-24	2.79328
COMMD9	3.61e-10	1.39e-09	6.20876
LMAN2L	2.43e-13	1.2e-12	6.68109
FAM49B	4.13e-19	2.9e-18	-2.91932
RSPH3	4.12e-05	9.58e-05	5.00348
SUGP2	8.79e-09	3.02e-08	5.95371
TSPAN15	0.000164	0.000352	1.01948
DCTN1	8.83e-19	6.08e-18	7.27907
TNNT1	4.42e-13	2.13e-12	6.64693
ARNTL	0.000203	0.000431	1.71185
ZER1	1.46e-59	4.16e-58	9.35057
TLE3	3.96e-10	1.52e-09	6.20194
NEK1	1.79e-06	4.88e-06	5.42059
TMED4	5.08e-11	2.1e-10	6.34866
ZNF627	9.97e-24	8.89e-23	-2.59546
ZNF202	4.38e-09	1.54e-08	1.06998
PKP4	3.93e-05	9.16e-05	-2.36522
DENND1A	4.65e-18	3.07e-17	2.31659
LSM14A	1.29e-10	5.15e-10	1.30413
ARHGEF10L	1.82e-24	1.68e-23	10.2477
SURF6	9.09e-11	3.68e-10	-6.26947
BPHL	9.15e-15	4.96e-14	3.07583
NPIPB2	6.06e-05	0.000138	1.0417
FAM104B	1.1e-10	4.42e-10	1.92567
FUT3	6.72e-11	2.75e-10	6.32928
NDUFAF7	7.5e-22	6.09e-21	-2.41878
AMMECR1L	3.29e-07	9.7e-07	1.22296
MAP3K9	2.34e-10	9.15e-10	-1.48846
TLE4	6.25e-05	0.000142	4.93931
SLC25A23	4.64e-05	0.000107	1.38832
MMP17	1.18e-21	9.48e-21	1.77268
GPR161	2.16e-09	7.8e-09	6.07066
SRGAP2	4.57e-07	1.33e-06	5.57453
SLC30A7	1.04e-11	4.53e-11	-1.938
SETD2	1.54e-07	4.69e-07	-5.65095
VEZT	0.000342	0.000703	-1.21021
SGSM3	2.26e-28	2.47e-27	2.58411
AGO4	2.98e-15	1.66e-14	6.91473
FAM149B1	2.26e-21	1.79e-20	1.88491
HSPG2	0	0	3.09555
ZNF624	1.32e-09	4.85e-09	-1.08835
TCF7	6.19e-10	2.34e-09	6.16816
CYB561D1	1.98e-83	8.83e-82	8.84719
PHF21A	5.94e-29	6.66e-28	1.91108
MRTFA	1.43e-56	3.77e-55	-9.21003
UHRF2	7.82e-97	4.27e-95	-1.34785
NPIPA3	7.49e-08	2.36e-07	5.75861
PDGFB	3.14e-149	3.02e-147	1.59582
NIF3L1	5.67e-08	1.81e-07	5.78516
SENP1	1.58e-12	7.29e-12	-1.81929
CHRDL1	1.88e-08	6.26e-08	-5.84932
FHL2	4.57e-132	3.79e-130	1.64215
TAF1C	5.72e-05	0.000131	-4.91882
MAPK9	3.27e-60	9.44e-59	5.07392
ZFP62	7.35e-09	2.54e-08	1.74476
ORAI2	1.82e-45	3.54e-44	1.26531
HDAC9	7.07e-05	0.000159	4.91988
SHC3	1.55e-05	3.79e-05	2.04735
FDXR	1.36e-05	3.36e-05	-5.12788
RAD17	3.55e-18	2.36e-17	-2.14856
SENP1	6.13e-15	3.35e-14	-1.79706
IGFBP7	1.06e-12	4.95e-12	6.59581
SPATS2	2.06e-25	1.99e-24	2.81018
SMCHD1	3.79e-42	6.68e-41	8.71917
PPP4R3B	4.96e-06	1.29e-05	-5.26069
ARHGEF10L	1.95e-05	4.72e-05	-5.07797
MRPL55	8.3e-07	2.35e-06	5.50907
HDAC9	2.87e-11	1.21e-10	6.38738
PPRC1	1.08e-06	3.01e-06	5.47951
SLC2A9	1.58e-19	1.14e-18	2.17933
HADHB	9.3e-06	2.34e-05	-1.33543
TMCO3	2.73e-05	6.48e-05	1.26603
ZSWIM1	5.36e-12	2.38e-11	6.49634
WDR4	6.75e-37	1.01e-35	-8.4346
RCHY1	2.89e-14	1.51e-13	6.79799
AGTRAP	3.02e-07	8.95e-07	1.35548
ANK3	1.87e-16	1.12e-15	2.28857
BAZ2B	5.82e-06	1.49e-05	5.27602
CAMK1	2.98e-28	3.25e-27	2.04952
MXD4	8.41e-18	5.47e-17	1.01964
SNCAIP	7.95e-05	0.000178	4.90117
C18orf54	0.000197	0.000418	1.0112
GABPA	7.08e-06	1.8e-05	5.25058
TOE1	5.7e-15	3.12e-14	6.88222
TRABD	2.5e-05	5.97e-05	1.34118
CCDC24	6.26e-19	4.35e-18	2.03433
CEP170	1.12e-05	2.78e-05	-1.42374
MTRR	3.24e-21	2.55e-20	-1.61232
TCFL5	8.62e-22	6.98e-21	-1.55712
ITGA1	1.13e-47	2.35e-46	2.46599
SP140	7.07e-05	0.000159	4.91988
ZNF217	1.38e-33	1.85e-32	1.84316
TNFSF13B	7.23e-07	2.06e-06	2.15744
GGA1	7.22e-17	4.45e-16	7.09078
HEXD	7.28e-11	2.97e-10	6.32374
NKTR	1.89e-15	1.07e-14	-1.68147
NAT1	0.000323	0.000665	-3.29667
IL9R	1.83e-12	8.44e-12	6.56268
LENG8	8.32e-06	2.1e-05	5.22943
NIPA2	8.5e-18	5.53e-17	3.08136
PSPH	9.36e-40	1.54e-38	1.83431
DLG1	0.000134	0.000291	1.96051
CTU2	1.15e-16	7.02e-16	-1.67083
CHRDL1	1.45e-09	5.31e-09	6.10246
MTOR	2.85e-33	3.76e-32	-8.24919
CLIP4	2.15e-16	1.29e-15	-1.71629
ICK	1.25e-08	4.23e-08	-5.88544
TCF3	8.13e-24	7.28e-23	6.24126
CFLAR	3.16e-22	2.62e-21	7.57562
PRDM15	4.96e-23	4.27e-22	-7.59605
ZFAND4	4.63e-10	1.77e-09	-2.59765
ST3GAL3	4.36e-06	1.14e-05	7.46629
ATXN7L2	6.89e-15	3.76e-14	-6.83215
AMZ2	2.98e-10	1.16e-09	-6.18426
CCNI	2.17e-12	9.94e-12	-6.51274
UBA2	1.24e-11	5.38e-11	-6.59873
PLEKHG2	9.26e-06	2.32e-05	-5.18
TBC1D3L	3.87e-05	9.02e-05	1.31391
ARSJ	2.08e-05	5.02e-05	-1.4894
MAN2B2	1.17e-18	8.01e-18	2.49892
LIG4	6.38e-78	2.62e-76	-2.3478
MIA2	5.5e-06	1.42e-05	-1.77407
ZNF385A	3.49e-06	9.21e-06	5.34028
RCAN1	3.39e-09	1.21e-08	1.15771
KIAA0556	3.48e-08	1.13e-07	1.07846
CDC16	6.59e-26	6.5e-25	-7.80399
AKAP7	1.06e-05	2.64e-05	5.19751
ZBTB44	3.53e-05	8.27e-05	-4.99222
PDE10A	1.66e-13	8.26e-13	-6.66265
CADPS2	1.98e-06	5.37e-06	2.29014
BPNT1	1.07e-13	5.39e-13	-6.68714
RFX2	1.82e-23	1.6e-22	1.32066
SERPING1	2.83e-59	8.02e-58	1.45511
PHC3	2.83e-52	6.67e-51	-9.06553
TPCN1	6.42e-05	0.000145	2.13951
ZNF34	0.000112	0.000245	-1.35433
AJM1	8.89e-23	7.55e-22	1.66837
POLR3E	8.87e-08	2.77e-07	1.5706
KAT6A	2.17e-25	2.09e-24	7.8111
LRRFIP1	2.02e-08	6.69e-08	5.88071
PCYT2	7.24e-09	2.5e-08	5.97033
TAF5L	1.72e-38	2.72e-37	-2.70716
APOBEC3H	3.26e-10	1.26e-09	1.78828
TLE1	2.42e-10	9.49e-10	-2.29549
LACTB	2.55e-10	9.96e-10	-6.19581
HACE1	4.73e-05	0.000109	-4.94827
ZNF529	5.23e-07	1.51e-06	-5.52348
DIAPH3	1.19e-11	5.14e-11	6.4456
VPS29	2.62e-11	1.11e-10	6.39338
RNF170	0.000176	0.000377	-1.09939
TATDN3	5.2e-08	1.66e-07	-1.68697
SCN8A	6.88e-08	2.17e-07	5.76679
LRCH4	8.06e-06	2.04e-05	1.76441
B3GALNT1	1.1e-08	3.75e-08	5.93399
FAM45A	1.23e-07	3.78e-07	-5.67316
ANKRD12	3.84e-12	1.72e-11	-6.47784
RARS2	8.11e-08	2.54e-07	5.75093
PPM1A	5.8e-10	2.2e-09	-6.13469
LRRC8D	4.61e-71	1.67e-69	-2.31254
RAB2B	7.38e-44	1.37e-42	-8.74635
TMUB2	1.02e-05	2.56e-05	-1.44345
LRRC29	0.000361	0.000739	1.98313
GPNMB	4.71e-42	8.29e-41	8.71509
ORC1	4.09e-48	8.63e-47	-1.96104
SUPT20H	5.63e-05	0.000129	4.95562
C14orf93	1.86e-05	4.51e-05	-5.08461
IL18	2.11e-08	7e-08	1.2501
TRIP12	2.62e-52	6.18e-51	-2.42577
MDM1	9.98e-07	2.8e-06	-5.45205
RNF44	5.5e-12	2.44e-11	6.4947
PPP1R13B	1.78e-06	4.84e-06	2.41917
GPR160	1.28e-05	3.15e-05	-2.54532
HPGD	0.000362	0.000739	-2.52434
POLB	4.41e-05	0.000102	4.99329
SPINT1	8.49e-14	4.31e-13	-1.18514
DIS3L	2.08e-18	1.41e-17	-7.20251
PAM	1.27e-08	4.29e-08	5.92183
DTNB	7.02e-11	2.87e-10	6.32633
TTBK2	6.48e-11	2.66e-10	6.33185
ZBTB43	3.29e-24	3.01e-23	-1.46351
R3HCC1L	7.94e-14	4.04e-13	6.74349
ZNF217	9.35e-10	3.49e-09	-1.19257
ARNTL	5.55e-06	1.43e-05	6.40773
BAZ1A	7.21e-36	1.05e-34	8.428
PPP4R3A	0	0	-1.25167
XAF1	1.52e-08	5.09e-08	5.90612
RELCH	4.12e-05	9.58e-05	5.00348
BANP	7.07e-12	3.12e-11	-3.2004
C1QTNF6	9.77e-10	3.64e-09	2.20673
ABLIM1	6.76e-13	3.22e-12	-4.93873
IFI27	9.43e-289	2.11e-286	1.09585
TAF8	4.68e-06	1.22e-05	-2.00255
ARHGAP42	0.000114	0.00025	4.84149
RBFOX2	3.74e-16	2.21e-15	1.48771
NEPRO	9.59e-44	1.77e-42	-7.09865
ERCC6L2	6.87e-08	2.17e-07	-2.74635
TJP1	1.25e-24	1.16e-23	1.73448
C17orf80	8.14e-21	6.28e-20	-7.41809
RAD54L	4.11e-06	1.07e-05	1.8007
ETV1	1.45e-05	3.55e-05	-5.11981
GABPB1	2.96e-22	2.45e-21	-7.53566
SLC39A13	5.57e-10	2.11e-09	1.56133
PLD1	1.28e-50	2.88e-49	9.05226
MAP4K1	0.000224	0.000472	1.40203
SBF1	1.01e-54	2.51e-53	-1.01688
ZBTB20	8.82e-13	4.16e-12	6.60648
KLHL5	4.24e-24	3.85e-23	3.78192
NEURL1	6.9e-17	4.26e-16	-2.61667
RUBCN	4.39e-54	1.08e-52	2.62921
ME3	6.53e-17	4.04e-16	1.44531
ZCCHC7	6.08e-13	2.9e-12	-6.58862
SRR	2.16e-08	7.16e-08	1.04544
RIMS2	2.18e-08	7.21e-08	5.87366
BCL2L1	4.75e-08	1.52e-07	1.02329
STK33	7.85e-07	2.22e-06	1.90186
TANK	6.97e-06	1.77e-05	1.27816
PRKAA2	4.25e-14	2.2e-13	-6.73729
ZNF283	1.34e-09	4.92e-09	-6.07046
C1orf116	5.25e-60	1.51e-58	9.36425
TBC1D5	3.71e-21	2.91e-20	-1.63938
GATAD1	0.000177	0.000378	-2.07231
VSIG10	1.6e-28	1.77e-27	2.39145
PDK1	6.03e-13	2.88e-12	-4.19853
DNPEP	1.04e-06	2.9e-06	12.1707
BPHL	3.32e-21	2.61e-20	1.60416
TOX2	1.81e-09	6.6e-09	-6.04641
TEC	1.43e-54	3.54e-53	5.45985
PTPRM	8.66e-05	0.000193	4.88723
2021-09-06	2.66e-11	1.12e-10	1.4959
KIF9	9.2e-05	0.000204	-4.84345
CDC25B	1.62e-64	5.14e-63	-3.81325
PBX1	1.37e-06	3.77e-06	1.12672
PPDPF	4.96e-18	3.27e-17	-7.16636
SLC39A11	0.000485	0.000975	4.58073
METTL16	1.85e-08	6.17e-08	-1.21935
ABCC6	1.86e-10	7.37e-10	6.25718
PPP2R1B	4.8e-109	3.09e-107	-2.16368
HUWE1	2.25e-05	5.4e-05	-5.05785
GIPR	4.32e-06	1.13e-05	3.32249
RANBP9	3.69e-13	1.79e-12	-1.71715
KIAA0319L	6.64e-09	2.3e-08	-9.7336
INPP5J	6.38e-06	1.63e-05	5.64884
NDRG2	2.54e-09	9.14e-09	6.05738
EML4	7.25e-52	1.68e-50	-2.41172
RHBDL1	8.61e-14	4.37e-13	6.73906
GLB1L	6.5e-09	2.26e-08	2.08253
BUD23	1.75e-21	1.39e-20	1.90872
NUP88	8.02e-17	4.92e-16	3.34048
SYTL4	8.67e-17	5.32e-16	7.0825
STXBP1	5.17e-12	2.3e-11	6.49863
CCDC9B	1.05e-47	2.18e-46	2.3934
RPP21	3e-14	1.57e-13	-1.54393
EHMT1	4.88e-06	1.27e-05	-5.26289
FAM126B	6.33e-25	5.98e-24	-7.73558
BET1L	1.1e-23	9.81e-23	-2.00075
PLA2G6	1.1e-13	5.53e-13	3.86515
PXK	0.000491	0.000987	4.57825
ZDHHC3	2.45e-12	1.12e-11	1.28974
MYEF2	5.03e-08	1.61e-07	-5.75926
NPIPA3	3.1e-07	9.16e-07	2.05484
FAM192A	3.22e-10	1.25e-09	6.21714
DOP1A	1.24e-17	8.02e-17	7.16837
UBE2R2	1.44e-20	1.1e-19	-1.09233
TIAM1	4.16e-08	1.34e-07	5.81439
VPS37A	1.22e-12	5.67e-12	-6.54773
VAC14	2.69e-20	2.02e-19	-1.03917
ZNF266	5.17e-08	1.65e-07	-1.2444
TMEM183A	4.26e-06	1.11e-05	-1.37527
CBWD2	5.8e-06	1.49e-05	-1.35195
PRSS12	1.8e-10	7.13e-10	-6.22091
FAM208B	0.000102	0.000224	-1.30997
KIF16B	1.62e-05	3.96e-05	1.49951
ACAD8	5.04e-36	7.36e-35	-4.49032
RGL2	4.9e-20	3.62e-19	1.66179
PTK2	1.94e-07	5.85e-07	2.02881
LRSAM1	1.06e-67	3.62e-66	9.58702
USP42	1.31e-12	6.08e-12	-6.54352
AHI1	1.13e-12	5.28e-12	-6.55223
[truncated: 22,363 more rows]
